# 1 Using Community Science to Reveal the Global 2 Chemogeography of River Metabolomes

3 Vanessa A. Garayburu-Caruso <sup>1,†</sup>, Robert E. Danczak <sup>1,†</sup>, James C. Stegen <sup>1</sup>, Lupita Renteria <sup>1</sup>,  
4 Marcy McCall <sup>1</sup>, Amy E. Goldman <sup>1</sup>, Rosalie K. Chu <sup>2</sup>, Jason Toyoda <sup>2</sup>, Charles T. Resch <sup>1</sup>, Joshua  
5 M. Torgeson <sup>1</sup>, Jacqueline Wells <sup>3</sup>, Sarah Fansler <sup>1</sup>, Swatantar Kumar <sup>1</sup> and Emily B. Graham <sup>1,4\*</sup>

6 <sup>1</sup> Pacific Northwest National Laboratory, Richland, WA 99352, USA;  
7 [vanessa.garayburu-caruso@pnnl.gov](mailto:vanessa.garayburu-caruso@pnnl.gov) (V.A.G.-C.); [robert.danczak@pnnl.gov](mailto:robert.danczak@pnnl.gov) (R.E.D.);  
8 [james.stegen@pnnl.gov](mailto:james.stegen@pnnl.gov) (J.C.S.); [lupita.renteria@pnnl.gov](mailto:lupita.renteria@pnnl.gov) (L.R.); [marcy.mccall@pnnl.gov](mailto:marcy.mccall@pnnl.gov) (M.M.);  
9 [amy.goldman@pnnl.gov](mailto:amy.goldman@pnnl.gov) (A.E.G.); [tom.resch@pnnl.gov](mailto:tom.resch@pnnl.gov) (C.T.R.); [joshua.torgeson@pnnl.gov](mailto:joshua.torgeson@pnnl.gov) (J.M.T.);  
10 [sarah.fansler@pnnl.gov](mailto:sarah.fansler@pnnl.gov) (S.F.); [kumar.swatantar@pnnl.gov](mailto:kumar.swatantar@pnnl.gov) (S.K.)

11 <sup>2</sup> Environmental Molecular Sciences Laboratory, Richland, WA 99352, USA; [Rosalie.Chu@pnnl.gov](mailto:Rosalie.Chu@pnnl.gov) (R.K.C.);  
12 [Jason.Toyoda@pnnl.gov](mailto:Jason.Toyoda@pnnl.gov) (J.T.)

13 <sup>3</sup> School of Chemical, Biological, and Environmental Engineering, Oregon State University, Corvallis, OR  
14 97331, USA; [jackie.wells.jw@gmail.com](mailto:jackie.wells.jw@gmail.com)

15 <sup>4</sup> School of Biological Sciences, Washington State University, Pullman, WA, 99164, USA

16 \* Correspondence: [emily.graham@pnnl.gov](mailto:emily.graham@pnnl.gov)

17 † Denotes equal contribution.

18 Received: 2 November 2020; Accepted: 15 December 2020; Published: date

19 **Abstract:** River corridor metabolomes reflect organic matter (OM) processing that drives aquatic  
20 biogeochemical cycles. Recent work highlights the power of ultrahigh-resolution mass spectrometry  
21 for understanding metabolome composition and river corridor metabolism. However, there have  
22 been no studies on the global chemogeography of surface water and sediment metabolomes using  
23 ultrahigh-resolution techniques. Here, we describe a community science effort from the Worldwide  
24 Hydrobiogeochemistry Observation Network for Dynamic River Systems (WHONDRS) consortium  
25 to characterize global metabolomes in surface water and sediment that span multiple stream orders  
26 and biomes. We describe the distribution of key aspects of metabolomes including elemental  
27 groups, chemical classes, indices, and inferred biochemical transformations. We show that  
28 metabolomes significantly differ across surface water and sediment and that surface water  
29 metabolomes are more rich and variable. We also use inferred biochemical transformations to  
30 identify core metabolic processes shared among surface water and sediment. Finally, we observe  
31 significant spatial variation in sediment metabolites between rivers in the eastern and western  
32 portions of the contiguous United States. Our work not only provides a basis for understanding  
33 global patterns in river corridor biogeochemical cycles but also demonstrates that community

34 science endeavors can enable global research projects that are unfeasible with traditional research  
35 models.

36 **Keywords:** environmental metabolomics; river corridor; sediment organic matter; WHONDRS;  
37 CONUS; carbon character; dissolved organic matter

38

---

## 39 1. Introduction

40 Organic matter (OM) transformations in aquatic ecosystems are a critical source of uncertainty  
41 in global biogeochemical cycles [1–4]. More than half of OM inputs to freshwater ecosystems are  
42 metabolized before reaching the oceans [1,2,4], yet while several studies have focused on quantifying  
43 OM uptake and export rates [1,5,6], the processes driving river corridor OM transformations across  
44 spatial scales remain poorly understood.

45 River corridor OM pools contain an extensive variety of molecules that are both produced and  
46 metabolized by microorganisms, which are processes reflected in the composition of sediment and  
47 surface water metabolomes [2,7,8]. Metabolic transformations of OM in freshwater ecosystems have  
48 been traditionally estimated by a combination of laboratory incubations and in-stream tracer  
49 additions [9–12]. However, results from incubation experiments are challenging to scale beyond  
50 laboratory conditions [9,10], and in-stream tracer processing often does not reflect ambient  
51 biogeochemical processes, as the naturally occurring metabolome is more chemically diverse than  
52 the tracer added to the stream [11,12]. Several studies have shown that OM pool composition can  
53 influence microbial activity, highlighting complexities in the metabolic processes that determine OM  
54 transformations [13–18]. Consequently, determining mechanisms underlying river corridor  
55 metabolome composition at a large scale remains challenging.

56 Environmental metabolomics uses the identification of small molecules in an organism  
57 (metabolites) to characterize the interactions of organisms within their environment [19]. Over the  
58 past several years, this definition has been extended to encompass all metabolites present in complex  
59 environmental systems for which it is difficult to attribute specific metabolites to specific organisms  
60 [20–24]. Different metabolomic techniques have been implemented across fields to enhance our  
61 understanding of microbial communities [25,26], anthropogenic activities and pollution sources [27–  
62 29], and potential bioremediation strategies [30]. Recently, environmental metabolomics, enabled by  
63 ultrahigh-resolution mass spectrometry, has allowed us to reveal connections between OM character,  
64 reactivity, and biochemical transformations within and across river ecosystems [15,17,18,31–35].  
65 These advances have vastly improved our understanding of the mechanisms governing OM  
66 bioavailability and biochemical transformations at a global scale. For instance, previous studies have

67 used ultrahigh-resolution metabolomics from river water across different climatic regions to find  
68 common compositional features that would inform global carbon dynamics [36] and to investigate  
69 environmental drivers affecting OM composition, bioavailability, and transport of OM [37]. In  
70 addition, recent studies show that OM thermodynamics influence aerobic respiration under carbon-  
71 limited scenarios [16], that biogeochemical hotspots are influenced by OM nitrogen content [17], and  
72 that hyporheic zone mixing induces OM metabolism via a priming effect [15]. These detailed  
73 metabolome characterizations have the potential to enable global-scale inferences about watershed  
74 features (e.g., vegetation, lithology, hydrology, microbiology, climate) that govern the reactivity and  
75 fate of OM across river corridors [35,38]. In turn, metabolomics can enhance our predictive  
76 capabilities of global river corridor biogeochemical cycles by helping to improve the representation  
77 of biochemical mechanisms in numerical models, such as reactive transport codes [39,40]. For  
78 example, an emerging substrate-explicit model uses thermodynamic theory to explicitly account for  
79 the chemical composition of all metabolites in OM pools to improve the predictive capacity of  
80 biogeochemical models [40].

81 Characterizing metabolomes across global spatiotemporal scales requires a way to collect  
82 multiple data types across diverse locations in such a way that they can be analyzed together. This  
83 goal can be facilitated by a framework that requires studies to Integrate biological, physical, and  
84 chemical processes across scales; Coordinate with consistent methods; be Open across the research  
85 lifecycle; and Network with global collaborators to reduce the burden on a single team (ICON)  
86 [41,42]. When ICON principles are applied, they allow for distributed sampling in ways that have  
87 historically been difficult to achieve.

88 The Worldwide Hydrobiogeochemistry Observation Network for Dynamic River Systems  
89 (WHONDRS) is a global consortium of researchers based out of Pacific Northwest National  
90 Laboratory that uses an ICON-based approach to understand coupled hydrologic, biogeochemical,  
91 and microbial functions in river corridors [35]. ICON principles allow WHONDRS to collect open,  
92 globally distributed data through collaboration with the scientific community. The WHONDRS  
93 consortium designs sampling campaigns that target specific spatial and temporal scales, modifies its  
94 approach based on community input, and then sends free sampling kits to collaborators. All  
95 WHONDRS data are openly accessible through Environmental Systems Science Data Infrastructure  
96 for a Virtual Ecosystem (ESS-DIVE-<https://data.ess-dive.lbl.gov/>) and the National Center for  
97 Biotechnology Information (NCBI), and the WHONDRS consortium ascribes to FAIR data principles  
98 (findable, accessible, interoperable, reusable) [43]. This approach enables WHONDRS to collect,  
99 analyze, and distribute ultrahigh-resolution metabolomic data to the global scientific community.

100 Here, we describe a community science effort conducted by the WHONDRS consortium during  
101 July-August 2019 that used Fourier-transform ion cyclotron resonance mass spectrometry (FTICR-

102 MS) to characterize metabolomes in global surface water and sediment spanning a range of biomes  
103 (e.g., desert-like in the Columbia Plateau, subtropical in southern Florida, temperate forests in the  
104 Mid-Atlantic) and stream orders [44]. We describe key metabolome characteristics of surface water  
105 and sediment and also explore spatial variation of these characteristics within the United States. We  
106 focus on central aspects of metabolomes including assigned elemental groups, chemical classes,  
107 descriptor indices, and biochemical transformations. This paper provides a benchmark for studying  
108 integrated surface water and sediment river corridor metabolomes and highlights the need to engage  
109 a wider scientific community in order to expand the reach and impact of scientific advancements.

## 110 **2. Results and Discussion**

### 111 *2.1. Surface Water Metabolome is More Unsaturated, Aromatic, Oxidized, Rich, and Variable than Sediment* 112 *Metabolome*

113 In order to assess patterns in global metabolome composition, we derived a number of  
114 descriptive metrics that summarize FTICR-MS metabolomic profiles. Specifically, we compared  
115 double-bond equivalents (DBE), modified aromaticity index ( $AI_{Mod}$ ), nominal oxidation state of  
116 carbon (NOSC), inferred chemical classes (e.g., lignin-like, protein-like), and elemental groups (e.g.,  
117 CHO, CHON, CHOSP) of surface water and sediment metabolomes. The double-bond equivalent  
118 metric (DBE) describes the degree of chemical unsaturation of bonds in a particular metabolite [45,46],  
119  $AI_{Mod}$  quantifies the degree of aromaticity (i.e., ring-like shape) of a metabolite [45–47], and NOSC  
120 indicates the energy required to oxidize different metabolomes [48]. High values of  $AI_{Mod}$  can denote  
121 the existence of either aromatic ( $AI_{Mod} > 0.5$ ) or condensed aromatic structures ( $AI_{Mod} \geq 0.67$ ), and high  
122 DBE indicates more saturated compounds. NOSC is inversely correlated with the Gibbs free energy  
123 of carbon oxidation. Higher NOSC corresponds to metabolites that are more oxidized and  
124 thermodynamically favorable [15–18,48,49]. Chemical class assignments for each metabolite were  
125 predicted using oxygen-to-carbon and hydrogen-to-carbon ratios (i.e., Van Krevelen classes [50]).  
126 Finally, we used the molecular formula assigned to each metabolite to describe the relative  
127 abundance of different heteroatom combinations associated with CHO groups (i.e., differences in -  
128 N, -S and/or -P). We then compared metrics across all metabolites found in any surface water sample  
129 vs. all metabolites found in any sediment sample. All analyses in Section 2.1 were conducted only on  
130 FTICR-MS peaks that were able to be assigned a molecular formula. Other metrics describing  
131 metabolome composition are reported in the SI (Table S1).

132 Surface water metabolomes were composed of comparatively more unsaturated and aromatic  
133 compounds with a higher nominal oxidation state than sediment. This was denoted by significantly  
134 higher  $AI_{Mod}$ , DBE, and NOSC than sediment metabolomes (Figure 1,  $p$ -value  $< 0.001$ ). In addition, we  
135 observed higher relative abundances of lignin-like, tannin-like, and condensed-hydrocarbon-like

136 metabolites in surface water versus sediment (Figure 2, all  $p$ -values < 0.001). These classes of  
137 metabolites are characteristic of terrestrial OM [51], and their prevalence in surface water  
138 metabolomes indicates a larger contribution of terrestrial OM in surface water relative to sediment.  
139 This may also indicate greater contributions of microbially processed OM in sediment, as has been  
140 observed previously in comparisons between surface water and hyporheic zone porewater [15, 52].  
141

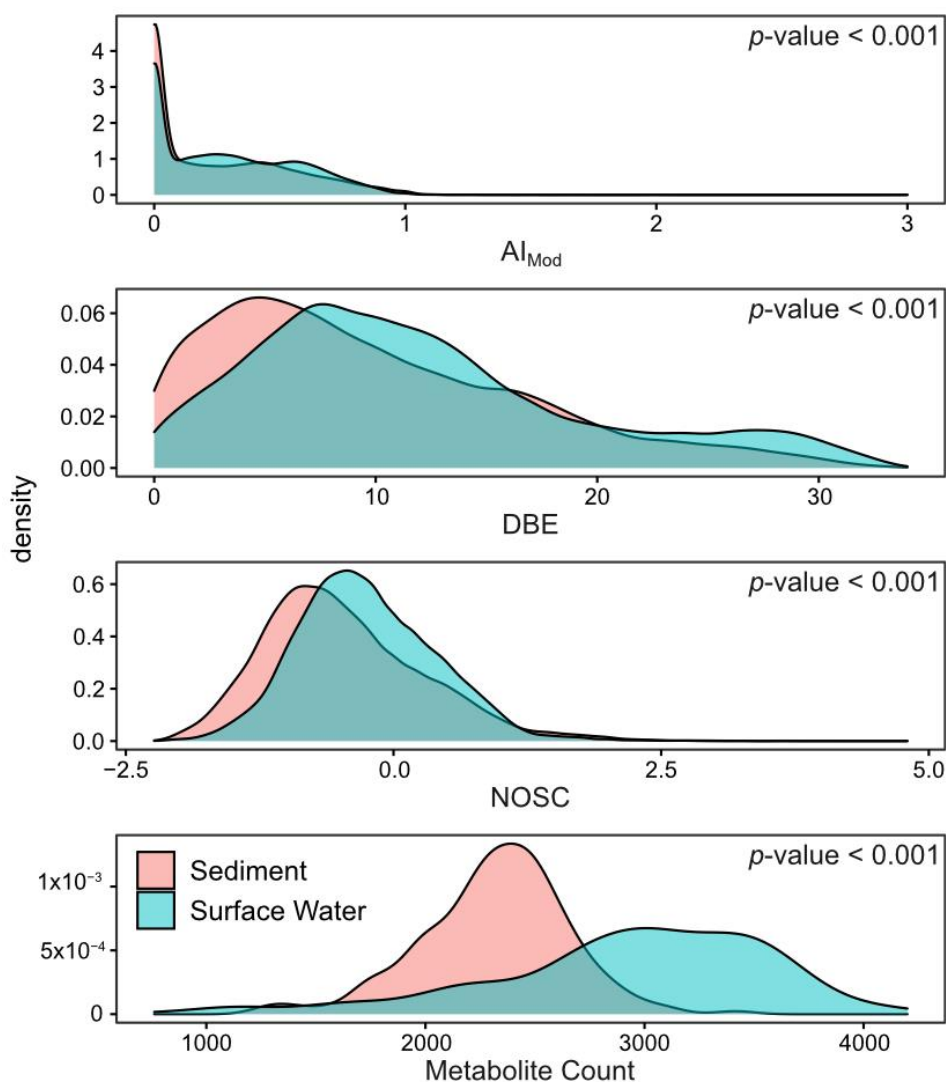

142

143 **Figure 1.** Density plots comparing the properties of all molecular formulas found in surface water  
144 and sediment samples. AI<sub>Mod</sub> (modified aromaticity index) is a measure of the potential ring-like  
145 structure in a given molecular formula. DBE (double-bond equivalents) is an approximation of  
146 potential unsaturation. NOSC (nominal oxidation state of carbon) represents the degree of  
147 oxidation/reduction of a given molecular formula. Significance values obtained via a two-sided  
148 Mann–Whitney U test to compare sample type distributions are denoted in the upper right corner of  
149 each panel.

150 The higher relative abundance of unsaturated and aromatic metabolites in surface water  
151 contrasts with previous studies that have observed that these compounds are more common in  
152 sediment porewater than in lake surface water or aquifer recharge water [53,54]. These studies  
153 inferred low physical, chemical, and/or biological transformation of sediment porewater associated  
154 OM. This deviation might be connected to the systems studied. For example, Pracht et al. [53]  
155 examined a system where sediment OM was protected due to physical and/or chemical constraints  
156 such as mineral sorption and hydrophobic encapsulation [53]. We studied rivers where the shallow  
157 benthic layer and the hyporheic zone are known to enhance biogeochemical reactions [55–59]. In turn,  
158 we hypothesize that very high rates of biological activity in riverbed sediment [60,61] could be  
159 responsible for lower  $AI_{Mod}$ , DBE, and NOSC values of sediment metabolomes relative to surface  
160 water, in contrast to previous work in potentially less active lake and aquifer systems.

161

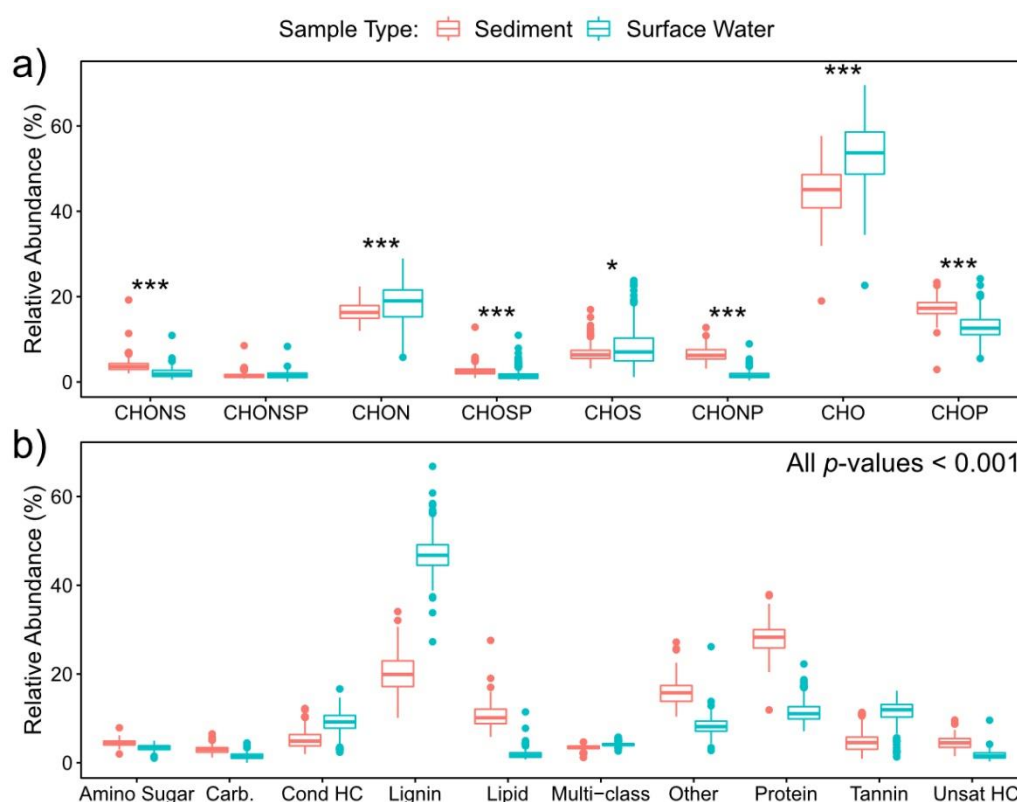

162

163 **Figure 2.** Box plots comparing the relative abundances of metabolites belonging to specific elemental  
164 groups (a) and chemical classes (b) between sediment and surface water. As in Figure 1, these values  
165 were obtained from all metabolites assigned molecular formulas in sediment and surface water.  
166 Significance values were obtained via a two-sided Mann–Whitney U test ( $0.05 > * > 0.01 > ** > 0.001 >$   
167 \*\*\*).

168 In addition, the relative abundances of lipid-like and protein-like metabolites were significantly  
169 higher in sediment than in surface water ( $p$ -value < 0.001). More lipid-like compounds in sediment  
170 could reflect higher microbial biomass [62] and further supports our inference that sediment  
171 metabolomes were influenced by microbial processes to a greater extent than surface water  
172 metabolomes. This highlights the key role played by riverbed sediment and associated hyporheic  
173 zones in river corridor biogeochemistry that likely influences global elemental cycles but is not  
174 captured in current Earth system models.

175 Conversely, elemental groups of metabolites were similar across surface water and sediment.  
176 The median abundance of each elemental group did not vary more than 5% between the two  
177 environments, except for CHO (~9%) and CHONSP (~0.2%, not statistically significant) groups. Bulk  
178 similarities in elemental groups, in contrast to chemical classes, could indicate that the presence or  
179 absence of heteroatoms alone is insufficient to distinguish metabolomes and that elemental  
180 stoichiometry of the entire metabolite (the basis for chemical class assignment) may be more  
181 important for distinguishing metabolomes. This is important because the elemental stoichiometry of  
182 metabolites can mechanistically connect OM thermodynamics to biogeochemical reactions and rates  
183 [40].

184 Metabolites found in surface water were distinct from and showed more among-sample  
185 variation than those in sediment. To evaluate compositional differences, we conducted a principal  
186 component analysis (PCA) and a beta-dispersion analysis (Figure 3). For consistency with prior  
187 analyses in this section, we present a PCA on only peaks assigned a molecular formula in Figure 3.  
188 When performed on all peaks, regardless of formula assignment, PCA results were consistent with  
189 Figure 3 (Figure S1, Table S2). The PCA, in conjunction with a PERMANOVA comparison, indicated  
190 that surface water and sediment metabolomes significantly diverged in composition ( $p$ -value < 0.001).  
191 Loadings for PC1 and PC2 are presented in Table S3. In general, the loadings suggest that many  
192 metabolites contributed to the separation between surface water and sediment metabolomes (PC1),  
193 while CHON-containing metabolites primarily drove variability in surface water metabolomes  
194 (PC2). The beta-dispersion analysis further indicated that surface water metabolomes were more  
195 dispersed in multivariate space than sediment metabolomes (Figure 3;  $p$ -value < 0.001). Additionally,  
196 surface water metabolomes had higher richness (i.e., more peaks with assigned formulas detected on  
197 average) than sediment metabolomes (Figure 1). These patterns indicate that metabolomes in surface  
198 water and sediment may be shaped by distinct processes that likely span differences in inputs, rates  
199 of microbial activity, and abiotic constraints.

200 We hypothesize that higher richness and greater among-sample variation in surface water  
201 metabolomes could reflect more heterogeneous environmental pressures. For example, we sampled  
202 across a broad range of latitudes and stream orders that likely led to among-site variation in light

203 exposure (Table S4 [44]). This may, in turn, have led to variation in surface water temperatures and  
204 surface water metabolite photodegradation, thereby increasing metabolome variability and richness  
205 [63]. Hydrology could also contribute to metabolome richness in surface water as precipitation events  
206 and associated runoff transport large amounts of terrestrial OM into rivers [64]. For example,  
207 precipitation has been shown to increase aromatic OM and decrease more labile OM in surface water  
208 [65–67]. We hypothesize that more immediate connectivity between surface water and terrestrial  
209 systems, relative to connectivity between sediment and terrestrial systems, is at least partially  
210 responsible for greater variation and higher richness in surface water metabolomes.

211 In addition, lower sediment metabolome variation and richness could be due to comparatively  
212 higher rates of microbial activity in sediment that degrade polymeric OM into a limited set of less  
213 chemically complex metabolites. This would result in a reduction in the number of distinct  
214 metabolites present by collapsing a diverse pool of OM into microbial exudates. Sediment  
215 metabolomes may also be constrained by interactions with sediment mineral surfaces, especially  
216 considering that we studied only the water-extractable metabolome. This subset of the full sediment  
217 metabolome may inherently be composed of a restricted suite of metabolites [68], leading to lower  
218 among-sample variation and lower richness. We nonetheless hypothesize that among-site variation  
219 in mineralogy could contribute to some of the observed sediment metabolome variation. The  
220 WHONDRS consortium is currently generating mineralogy data to test this hypothesis.

221 Together, the observations presented in this section indicate that there are significant differences  
222 across global surface water and sediment metabolomes, where surface water metabolomes are more  
223 unsaturated, aromatic, oxidized, rich, and variable. These characteristics suggest that surface water  
224 metabolomes are more dynamic due to a variety of watershed and river corridor processes (discussed  
225 above), while sediment metabolomes may be more stable integrators of localized processes (e.g.,  
226 mineral interactions and microbial processing of OM).

227



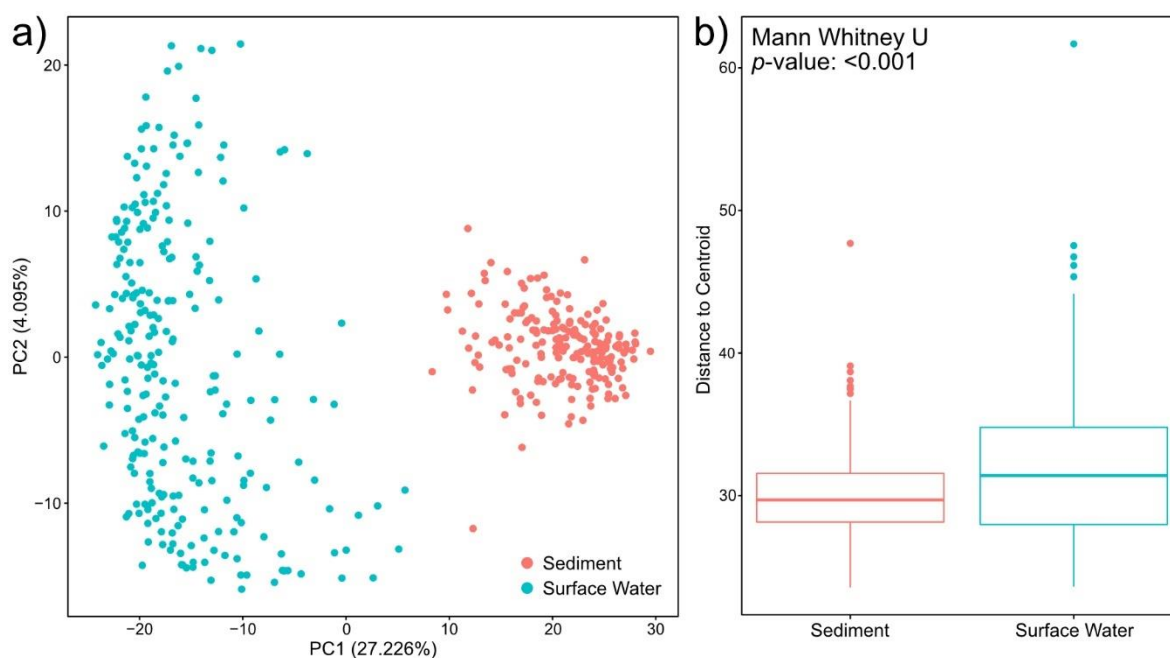

228

229

230

231

232

233

**Figure 3.** Principal component analysis (PCA) of the molecular formula data (a). Differences between surface water and sediment metabolomes were significant per a Euclidean distance-based PERMANOVA ( $p$ -value < 0.001). The degree of among-sample variation was evaluated by quantifying beta-dispersion. Surface water had higher beta-dispersion per a two-sided Mann-Whitney U test ( $p$ -value < 0.001) (b).

234

## 2.2. Nitrogen-, Sulfur- and Phosphorous-Containing Transformations Vary Across Surface Water and

235

### *Sediment Metabolomes*

236

237

238

239

240

241

242

243

244

245

246

We evaluated how potential reactions in metabolomes varied across the globe by inferring biochemical transformations as per Bailey et al. [62], Kaling et al. [69], Moritz et al. [70], Graham et al. [17,18], Garayburu-Caruso et al. [16], Danczak et al. [38], and Stegen et al. [15]. This method leverages the ultrahigh-resolution of FTICR-MS to compare mass differences between detected peaks to a database of common biochemical transformations. Identified biochemical transformations provide information regarding the frequency at which a specific molecule could have been gained or lost during metabolism. Resulting transformation counts can then be separated based upon their chemical properties to study the potential role of the molecule gained or lost in metabolome composition. Unlike the analyses described in the previous section, where formula assignments of metabolites are necessary, this method allows for the incorporation of all detected metabolites into downstream analyses.

247

248

249

250

We observed that biochemical transformations involving molecules containing nitrogen (N), sulfur (S), or phosphorous (P) exhibited divergent patterns between surface water and sediment metabolomes (Figure 4). Specifically, surface water had a significantly higher relative abundance of N-containing transformations, while sediment metabolomes had more S- and P-containing

251 transformations ( $p$ -value  $< 0.001$  in all cases). This contrast between surface water and sediment may  
252 occur due to variation in nutrient requirements within the water column and sediment, as  
253 biochemical transformations have been inferred to reflect nutrient limitations in other systems. For  
254 example, Garayburu-Caruso et al. [16] found an increase in N-containing transformations under  
255 nutrient-limited conditions, but only when N-containing OM was introduced. More N-containing  
256 transformations in surface water as compared to sediment could therefore reflect microbial N mining  
257 in surface water through the preferential decomposition of N-containing OM [71,72]. In addition, a  
258 higher abundance of P- and S-containing biochemical transformations in sediment further suggest  
259 that microbial metabolism is limited by different factors between surface water and sediment  
260 environments, which are potentially associated with nutrient assimilation processes [73,74].

261

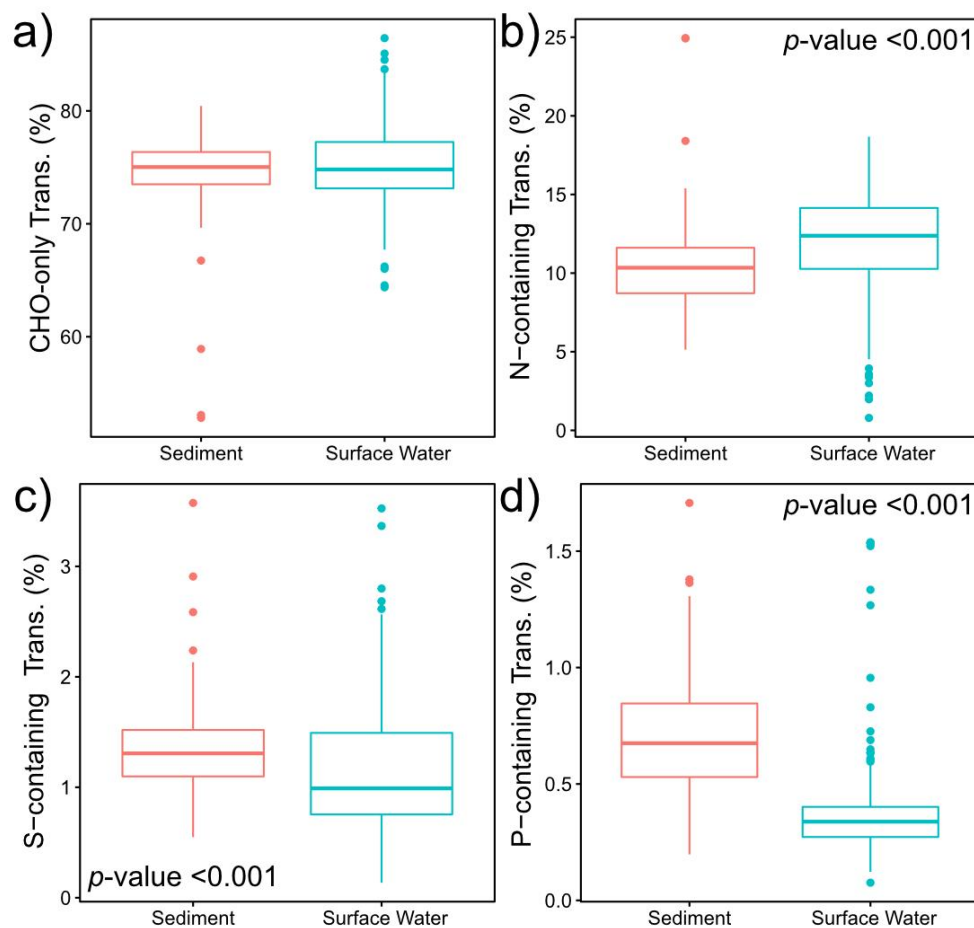

262

263 **Figure 4.** Boxplots displaying the patterns of CHO-only transformations (a); N-containing  
264 transformations (b); S-containing transformations (c); and P-containing transformations (d). False  
265 discovery rate (FDR)-corrected two-sided Mann-Whitney U test  $p$ -values are provided in either the  
266 top right or the bottom left corner of panels with significant comparisons.

267           Interestingly, the higher abundance of N-containing transformations in surface water observed  
268 in this study is contrary to past work, where porewater had a higher relative abundance of N-  
269 containing transformations than surface water [15,38]. Given that these studies were collected from  
270 the Pacific Northwest region of the United States (e.g., eastern Washington and Oregon), this  
271 highlights the necessity to expand research beyond individual test systems or geographic regions and  
272 emphasizes the utility of global studies through efforts like WHONDRS.

273           In contrast, biochemical transformations that did not involve N-, S-, or P-containing molecules  
274 were not significantly different between surface water and sediment metabolomes. Similar patterns  
275 have been observed in other studies [38]. These results indicate the presence of ubiquitous  
276 biochemical transformations that occur in both surface water and sediment (Figure 4). Based on these  
277 results, we hypothesize that N-, S-, and P-containing transformations may have a stronger  
278 dependency than CHO-only transformations on nutrient status. That is, changes in nutrient  
279 availability across surface water and sediment environments may drive shifts in N-, S-, and/or P-  
280 containing transformations but not influence transformations that do not involve these nutrients.  
281 Additional data on variation in nutrient limitation and availability will be required to test this  
282 hypothesis.

283

284 2.3. Sediment Metabolomes are More Spatially Variable Than Surface Water Metabolomes

285 Because most of our sampling locations were in the contiguous United States (CONUS), we used  
286 CONUS data to resolve potential spatial patterns in metabolomes (Figures 5 and 6). In order to  
287 uncover site-by-site metabolomic variation, we calculated the mean value for each derived metric  
288 (e.g.,  $AI_{Mod}$ , NOSC, DBE) and calculated the relative abundance of elemental groups and chemical  
289 classes (e.g., CHO and lignin-like) for each sample.

290 Overall, differences between the mean properties of CONUS surface water and sediment  
291 metabolomes were generally consistent with differences between global surface water and sediment  
292 metabolomes reported in Figure 1. For instance, surface water metabolomes displayed higher  $AI_{Mod}$ ,  
293 DBE, and NOSC than sediment metabolomes (Figure 5,  $p$ -value < 0.001 for all, Table S5). We also  
294 observed similar patterns in both the relative abundances of specific elemental groups (Figure 6,  $p$ -  
295 value < 0.001 for all, Table S5) and chemical classes ( $p$ -value < 0.001 for all, Table S5 and File S1). In  
296 order to expand our analyses, we investigated spatial patterns in individual metabolomic features  
297 across the CONUS by comparing sites that were east (hereafter “East”, surface water  $n = 34$ , sediment  
298  $n = 33$ ) vs. west (hereafter “West”, surface water  $n = 45$ , sediment  $n = 38$ ) of the Mississippi River.

299

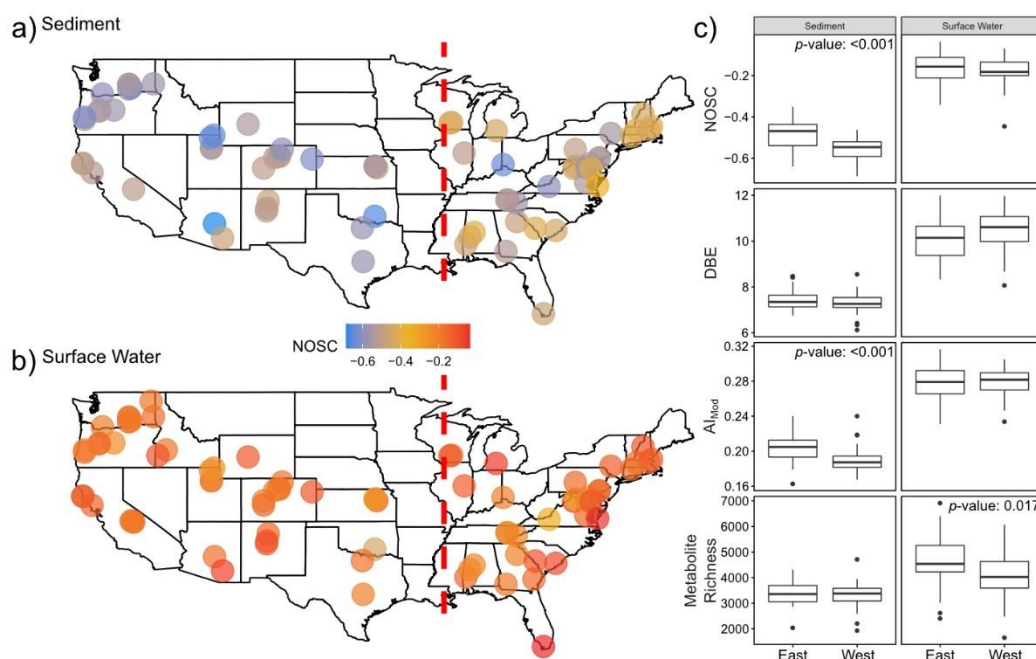

300

301 **Figure 5.** Maps of the United States revealing the spatial variability of average NOSC in sediment (a)  
302 and surface water (b) metabolomes. East vs. West spatial patterns for various derived metrics are  
303 displayed in panel (c). Statistically significant differences identified via a two-sided Mann–Whitney  
304 U test are indicated by  $p$ -values listed in each comparison. The red dashed line represents the

305 longitude of the Mississippi River at St. Louis, MO, USA—the dividing line between East and West  
306 samples.

307 In general, we observed greater spatial patterning in sediment metabolomes than in surface  
308 water metabolomes. Average NOSC and  $AI_{Mod}$  values of sediment metabolomes were higher in the  
309 East than in the West ( $p$ -value  $< 0.001$  for both). Metabolites containing CHONP, CHONS, or CHOSP  
310 constituted a significantly lower relative abundance of metabolomes in the East sediment, relative to  
311 the West ( $p$ -value  $< 0.001$  for all). Lastly, lignin- and tannin-like metabolites constituted a higher  
312 relative abundance of sediment metabolomes in the East, while protein-, condensed-hydrocarbon-,  
313 and unsaturated-hydrocarbon-like metabolites were more abundant in the West ( $p$ -value  $< 0.001$  for  
314 all, Table S5 and File S1).

315 In contrast to spatial patterns in sediment metabolomes, surface water showed less spatial  
316 structure with only CHO and CHOS metabolites showing significant shifts between East and West  
317 ( $p$ -value  $< 0.001$  for both). CHO and CHOS metabolites comprised higher and lower relative  
318 abundances in the West than in the East, respectively (Figure 6). No spatial patterns were observed  
319 in NOSC ( $p$ -value = 0.4, Table S5), DBE ( $p$ -value = 0.07, Table S5), or  $AI_{Mod}$  ( $p$ -value = 0.93, Table S5) in  
320 surface water (Figure 5). Results from the remainder of molecular indices, elemental groups, and  
321 chemical class comparisons are shown in Table S5 and File S1.

322

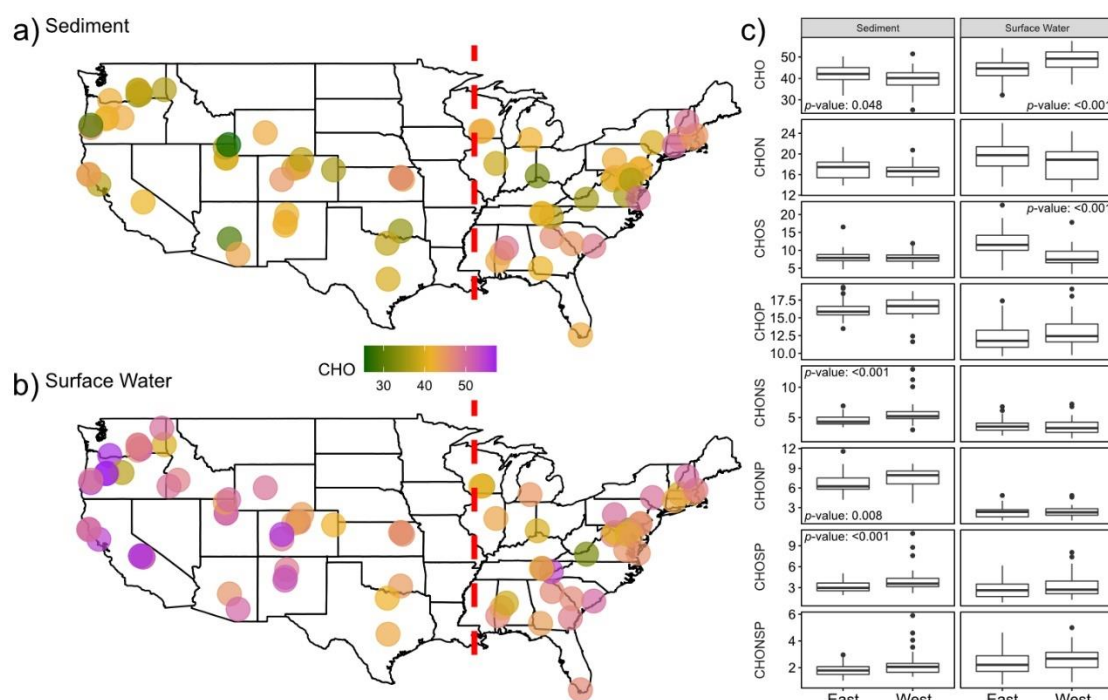

323

324 **Figure 6.** Maps of the United States revealing the spatial variability of the relative abundance of  
325 metabolites containing only CHO with sediment (a) and surface water (b); East vs. West spatial

326 patterns for different elemental groups' relative abundances are displayed in panel (c). Statistically  
327 significant differences identified via a two-sided Mann–Whitney U test are indicated by *p*-values  
328 listed in each comparison. The red dashed line represents the longitude of the Mississippi River at St.  
329 Louis, MO, USA—the dividing line between East and West samples.

330 Together, these patterns suggest that spatial differences in the metabolic processes driving OM  
331 cycling in the East versus the West have a stronger influence on sediment metabolomes than surface  
332 water metabolomes. While our non-spatial analyses showed greater among-sample and among-site  
333 variability in surface water metabolomes (Figure 3), the lack of spatial structure across the CONUS  
334 suggests that this variability is not driven by factors that are spatially structured at the continental  
335 scale. Instead, we hypothesize that surface water metabolomes are more temporally variable due to  
336 fluctuating inputs from precipitation events. To more directly evaluate spatial structure in surface  
337 water metabolomes, it is likely necessary to control for precipitation history and hydrologic  
338 connectivity to terrestrial systems. These inferences are supported by previous studies addressing  
339 spatial dissolved OM chemography dynamics showing that longitudinal patterns of dissolved OM  
340 in surface water are sensitive to hydrologic events [75–77]. However, there is a complex interaction  
341 between hydrology and space, as the sources and quality of OM from different regions may respond  
342 differently to hydrological variation [78].

343 The contrasting patterns in surface water and sediment metabolome characteristics across the  
344 East-West gradient could be the result of many factors, including vegetation cover [79], underlying  
345 lithology [80], photoreactivity [63], climate and precipitation regime [80], and/or microbial  
346 metabolism [81]. Additional data and analyses will be required to disentangle the relative  
347 contributions of these potential drivers. Pursuing this knowledge is important for explaining and  
348 ultimately predicting OM transformations. In turn, representing these processes and their impacts on  
349 biogeochemical cycles in process-based models has the potential to improve the accuracy of  
350 biogeochemical predictions across the globe.

351

### 352 3. Materials and Methods

#### 353 3.1. WHONDRS Summer 2019 Sampling Campaign

354 In July and August 2019, the WHONDRS consortium initiated a study of global river corridors  
355 to evaluate interactions between ecosystem features, microbial communities, and metabolomes in  
356 surface water and shallow sediments. To design the study, the WHONDRS consortium held multiple  
357 webinars with collaborators who volunteered to collect samples. The webinars allowed for  
358 community input on sampling protocol and data collected. More details are available at  
359 <https://whondrs.pnnl.gov>.

360 Briefly, WHONDRS developed sampling protocols and videos in coordination with the scientific  
361 community that were made openly available via YouTube, sent free sampling kits to collaborators,  
362 and conducted a suite of biogeochemical analyses on surface water and sediment. All data will be  
363 made open access following QA/QC at <https://data.ess-dive.lbl.gov/>. Preliminary data are available  
364 on a Google Drive linked via <https://whondrs.pnnl.gov> as they become available.

365 The 2019 study collected samples and metadata associated with stream order, climate,  
366 vegetation, and geomorphological features from 97 river corridors in 8 countries within a 6-week  
367 period, from 29 July to 19 September (Table S4, [44]). Stream order information (Table S4) was  
368 acquired for sites within the continental United States through the EPA National National  
369 Hydrography Dataset Plus ([https://www.epa.gov/waterdata/nhdplus-national-hydrography-](https://www.epa.gov/waterdata/nhdplus-national-hydrography-dataset-plus)  
370 [dataset-plus](https://www.epa.gov/waterdata/nhdplus-national-hydrography-dataset-plus)), and stream orders for a couple of Canada sites were acquired through British Columbia  
371 Data Catalogue (<https://catalogue.data.gov.bc.ca/dataset/75299593-3222-40f9-879f-29e9824fc978>).  
372 Stream orders indicate the relative size of a stream [82]. The data provided in the SI were calculated  
373 following Strahler's definition of stream order [83]. This is estimated based on the size of its  
374 tributaries; for example, if two 1st order streams come together, they will form a 2nd order stream.  
375 Lower stream orders tend to be small tributaries or headwaters, while large stream orders are often  
376 major rivers [82,83].

377 This paper focuses on surface water (95 sites) and sediment (78 sites) collected across biomes  
378 (i.e., desert, tropical, temperate forests), from which a total of 504 samples were analyzed. Toyoda et  
379 al. [44] provide additional metadata associated with specific site characteristics (e.g.,  
380 hydrogeomorphology, vegetation, temperature, discharge).

#### 381 3.2. Sample Collection and Laboratory Pre-Processing

382 At each location, collaborators selected sampling sites within 100 m of a station that measured  
383 river discharge, height, or pressure. Within each site, 3 depositional zones were identified for  
384 sediment collection following NEON's protocol (NEON.DOC.001193; [84]) and labeled as upstream,

385 midstream, or downstream. The depositional zones were situated within 10 m of each other. Surface  
386 water was sampled in triplicate prior to sediment sampling. Surface water was collected only at the  
387 downstream site before collecting the sediments to make sure the water collected was not affected by  
388 sediment debris mobilized during water or sediment sampling at upstream locations. Sediments  
389 were collected from all three zones, where each zone provided a biological replicate of a sediment  
390 sample.

391 Surface water was collected using a 60 mL syringe and was filtered through a 0.22  $\mu\text{m}$  sterivex  
392 filter (EMD Millipore) into a 40 mL glass vial (I-Chem amber VOA glass vials; ThermoFisher, pre-  
393 acidified with 10  $\mu\text{L}$  of 85% phosphoric acid). Subsequently, 125 mL of surface sediments (1–3 cm  
394 depth) were sampled from a  $\sim 1\text{m}^2$  area at each depositional zone with a stainless steel scoop, making  
395 sure the sediments were saturated upon collection. All samples were shipped to Pacific Northwest  
396 National Laboratory on blue ice within 24 h of collection.

397 Surface water samples were immediately frozen at  $-20\text{ }^\circ\text{C}$  upon receiving. Sediments from each  
398 depositional zone were individually sieved to  $<2\text{ mm}$ , subsampled into proteomic friendly tubes  
399 (Genesee Scientific), and stored at  $-20\text{ }^\circ\text{C}$  for FTICR-MS analysis.

400



401 3.3. *Fourier Transform Ion Cyclotron Resonance Mass Spectrometry (FTICR-MS)*

402 Surface water samples were thawed in the dark at 4 °C for 72 h. Non-purgeable organic carbon  
403 (NPOC) was determined using a 5 mL aliquot of the acidified water sample by a Shimadzu  
404 combustion carbon analyzer TOC-L CSH/CSN E100V with ASI-L autosampler. NPOC concentrations  
405 (Table S6) were normalized to 1.5 mg C L<sup>-1</sup> across all samples to allow for data comparison across  
406 sites within this study and other WHONDERS sampling campaigns. Diluted samples were acidified  
407 to pH 2 with 85% phosphoric acid and extracted with PPL cartridges (Bond Elut), following Dittmar  
408 et al. [85].

409 Sediment samples were thawed overnight in the dark at 4 °C. Then, sediment organic matter  
410 was extracted in proteomic friendly tubes (Genesee Scientific) with a 1:2 ratio of sediment to water (5  
411 g of sediment to 10 mL of milli-Q water). During the extraction, tubes were continuously shaken in  
412 the dark at 375 rpm and 21 °C for 2 h, after which the tubes were centrifuged at 6000 rcf and 21 °C for  
413 5 min. The supernatant was collected and filtered through 0.22 µm polyethersulfone membrane filter  
414 (Millipore Sterivex, USA) into borosilicate glass vials. NPOC (Shimadzu combustion carbon analyzer  
415 TOC-Vcsh with ASI-V autosampler) was determined using a 5 mL aliquot from the filtered  
416 supernatant. As with the water samples, this supernatant was normalized to a standard NPOC  
417 concentration (Table S4) of 1.5 mg C L<sup>-1</sup>, acidified to pH 2 with 85% phosphoric acid, and extracted  
418 with PPL cartridges following the same methods described above.

419 A 12 Tesla (12 T) Bruker Solarix Fourier transform ion cyclotron mass spectrometer (FTICR-MS;  
420 Bruker, Solarix, Billerica, MA, USA) located at the Environmental Molecular Sciences Laboratory in  
421 Richland, WA, was used to collect ultrahigh-resolution mass spectra of surface water and sediment  
422 OM pools. Resolution was 220 K at 481.185 *m/z*. The FTICR-MS was outfitted with a standard  
423 electrospray ionization (ESI) source, and data were acquired in negative mode with the voltage set to  
424 +4.2 kV. The instrument was externally calibrated weekly to a mass accuracy of <0.1 ppm; in addition,  
425 the instrument settings were optimized by tuning on a Suwannee River Fulvic Acid (SRFA) standard.  
426 Data were collected with an ion accumulation of 0.05 sec for surface water and 0.1 or 0.2 sec for  
427 sediment from 100–900 *m/z* at 4 M. One hundred forty-four scans were co-added for each sample and  
428 internally calibrated using an OM homologous series separated by 14 Da (–CH<sub>2</sub> groups). The mass  
429 measurement accuracy was typically within 1 ppm for singly charged ions across a broad *m/z* range  
430 (100 *m/z*–900 *m/z*). BrukerDaltonik Data Analysis (version 4.2) was used to convert raw spectra to a  
431 list of *m/z* values by applying the FTMS peak picker module with a signal-to-noise ratio (S/N)  
432 threshold set to 7 and absolute intensity threshold to the default value of 100. We aligned peaks (0.5  
433 ppm threshold) and assigned chemical formulas using Formularity [86]. The Compound  
434 Identification Algorithm in Formularity was used with the following criteria: S/N > 7 and mass

435 measurement error <0.5 ppm. This algorithm takes into consideration the presence of C, H, O, N, S,  
436 and P and excludes other elements.

437 It is important to note that FTICR-MS is not quantitative and does not provide information about  
438 the structure of the molecular formulas identified. This method provides a non-targeted approach to  
439 reliably identify molecular formulas of organic metabolites with masses between 200–900 *m/z*. The  
440 power of FTICR-MS is that it can capture thousands of metabolites simultaneously in contrast to other  
441 global environmental metabolomics techniques that yield less information. A key consideration with  
442 FTICR-MS-derived information is that it captures all ionizable organic molecules and thus is source-  
443 agnostic (e.g., not all detected compounds are guaranteed to be biologically derived). Hence there is  
444 a tradeoff of depth vs. specificity in metabolomics methods, and FTICR-MS sacrifices some specificity  
445 for depth. In addition, the sediment-water extractions performed in this study provide chemical  
446 selectivity towards water-extractable OM. Although water-soluble OM in the sediments is the  
447 primary interest of this study, the extraction method has the potential to bias towards the most labile  
448 pool of the sediment OM and can also extract a higher abundance of carbohydrates when compared  
449 to other solvents [68].

450

#### 451 3.4. FTICR-MS Data Analysis

452 All FTICR-MS analyses were performed using R v4.0.0 [87], and all plots were generated using  
453 the ggplot2 package (v3.2.2) [88]. The R package “ftmsRanalysis” [89] was used to (1) remove peaks  
454 outside of a high confidence  $m/z$  range (200  $m/z$ –900  $m/z$ ) and/or with a  $^{13}\text{C}$  isotopic signature; (2)  
455 calculate molecular formula properties (i.e., Kendrick defect, double-bond equivalent, modified  
456 aromaticity index, nominal oxidation state of carbon, standard Gibbs Free Energy of carbon  
457 oxidation); and (3) to determine to which chemical class a given metabolite belonged [45,46,48,50].  
458 Using “ftmsRanalysis” [75] data outputs, we can obtain the central aspects of metabolomes  
459 investigated in this study, where elemental groups are categorized by the combination of elemental  
460 atoms present in each metabolite with molecular formula identified (e.g., CHO, CHON, CHOSP). The  
461 double-bond equivalent metric (DBE) describes the degree of chemical unsaturation of bonds in a  
462 particular metabolite [45,46], the modified aromaticity index ( $\text{AI}_{\text{Mod}}$ ) quantifies the degree of  
463 aromaticity (i.e., ring-like shape) of a metabolite [45–47], and NOSC indicates the energy required to  
464 oxidize different metabolomes [48]. High values of  $\text{AI}_{\text{Mod}}$  can denote the existence of either aromatic  
465 ( $\text{AI}_{\text{Mod}} > 0.5$ ) or condensed aromatic structures ( $\text{AI}_{\text{Mod}} \geq 0.67$ ), and high DBE indicates more saturated  
466 compounds. NOSC is inversely correlated with the Gibbs free energy of carbon oxidation. Higher  
467 NOSC corresponds to metabolites that are more oxidized and thermodynamically favorable [15–  
468 18,48,49]. Chemical class assignments for each metabolite were predicted using oxygen-to-carbon and  
469 hydrogen-to-carbon ratios (i.e., Van Krevelen classes [50]).

470 In order to evaluate bulk variation across sample types, a Mann–Whitney U test (*wilcox.test*) with  
471 a false discovery rate (FDR)  $p$ -value adjustment (*p.adjust*) was used to evaluate the divergence in  
472 molecular properties of all metabolites with molecular formulas assigned (46.08% of the total 95,681  
473 peaks) present in either surface water or sediment. Differences in elemental group and chemical class  
474 relative abundances within samples between surface water and sediment were evaluated using the  
475 same approach. A principal component analysis (PCA; *prcomp*) was used to visualize differences  
476 between surface water and sediment metabolomes after a presence/absence transformation. A  
477 Euclidean distance matrix was obtained (*vegdist*, *vegan* package v2.5-6) and evaluated using a  
478 PERMANOVA (*adonis*, *vegan* package v2.5-6) in order to assess multivariate differences between  
479 sample types [90]. Inter-sample type variability was evaluated using the same Euclidean distance  
480 matrix in a beta-dispersion analysis (*betadisper*, *vegan* package v2.5-6); divergence in distance to  
481 centroid values was then evaluated using a Mann–Whitney U test [90].

482 To determine CONUS-scale patterns, sites were divided into eastern and western US based on  
483 their position relative to the location of the Mississippi River at St. Louis, Missouri. Replicates at each  
484 site were merged such that if a metabolite was observed in one replicate, it was considered present  
485 at the site. Given that FTICR-MS samples typically have less than 100% reproducibility [91,92], we

486 considered a metabolite to be present in a sample if it was detected in any of the three replicates. This  
487 allowed us to maximize our detection of metabolites and has been previously employed [38]. Average  
488 molecular properties were then calculated, and elemental group/chemical class relative abundances  
489 were determined for each site/sample type combination based upon the metabolites present. This  
490 resulted in a single value for any given variable in surface water or sediment at a given site.  
491 Differences between these values across the East vs. West CONUS were then assessed using a Mann-  
492 Whitney U test with FDR correction. Maps were generated using ggplot to visualize spatial variance.  
493 All maps can be found in File S1.

### 494 *3.5. Biochemical Transformation Analysis*

495 We inferred biochemical transformations in sediment and surface water metabolomes as per  
496 Bailey et al. [62], Kaling et al. [69], Moritz et al. [70], Graham et al. [17,18], Garayburu-Caruso et al.  
497 [16], Danczak et al. [38], and Stegen et al. [15] to estimate the gain or loss of specific molecules (e.g.,  
498 glucose, valine, glutamine). Briefly, pairwise mass differences were calculated between every peak  
499 in a sample and compared to a reference list of 1255 masses associated with commonly observed  
500 biochemical transformations (i.e., reactions of organic matter, Table S7). It is important to note that a  
501 molecular formula assignment is not necessary for this method as it allows for the incorporation of  
502 all detected metabolites. For mass differences matching to compounds in the reference list (within 1  
503 ppm), we inferred the gain or loss of that compound via a biochemical transformation. For example,  
504 if a mass difference between two peaks corresponded to 71.0371, that would correlate to the loss or  
505 gain of the amino acid alanine, while a mass difference of 79.9662 would correspond to a loss or gain  
506 of a phosphate. Transformations were separated into 4 different groups based upon their labels:  
507 CHO-only, N-containing, S-containing, and P-containing. Differences in the relative abundance of  
508 transformations across samples were identified using a Mann-Whitney U test with FDR correction.

### 509 *3.6. Data Availability*

510 Original and expanded metadata, as well as surface water and sediment data used in this study,  
511 are publicly available on the Department of Energy data archive site ESS-DIVE [44,93]. All scripts  
512 used in this study are available on GitHub at  
513 <https://github.com/danczakre/GlobalRiverMetabolomes>.

## 514 **4. Conclusions**

515 We leveraged community science facilitated by the WHONDRS consortium to present the first  
516 ultrahigh-resolution analysis of global river corridor metabolomes of both surface water and  
517 sediment. Our data showed a strong divergence between surface water and sediment metabolomes,

518 consistent with previous work within local systems. Surface water metabolomes were more rich and  
519 variable and contained more unsaturated and aromatic metabolites than sediment, possibly  
520 suggesting higher influence from terrestrial inputs or lower microbial processing. Further, surface  
521 water and sediment metabolomes had a consistent set of core biochemical transformations (CHO-  
522 only) but differed in N-, S-, and P-containing transformations that may be more influenced by  
523 nutrient limitations. Finally, we hypothesize the presence of systematic, spatially structured drivers  
524 influencing sediment metabolomes more strongly than surface water, as sediment changed along  
525 longitudinal patterns within the contiguous United States.

526 While there are many potential explanations for these patterns, the publicly available datasets  
527 being actively compiled by WHONDORS are well-suited for follow-on analyses to identify factors  
528 underlying metabolome variability. Given that the WHONDORS sampling campaign spanned 1<sup>st</sup> to 9<sup>th</sup>  
529 stream orders across multiple biomes (e.g., desert-like in the Columbia Plateau, subtropical in  
530 southern Florida, temperate forests in the Mid-Atlantic), outcomes of current and future data  
531 analyses and modeling efforts will enable transferable knowledge that can be applied throughout the  
532 world. To expand the breadth of questions that can be pursued with the data, WHONDORS is currently  
533 collecting information pertaining to mineralogy, geochemistry (e.g., anion and total N  
534 concentrations), microbiology (e.g., metagenomics, metatranscriptomics, flow cytometric cell  
535 counts), and various remote sensing data types (e.g., vegetation cover). Future questions might, for  
536 example, involve exploring spatial patterns of metabolomes across stream orders; correlating N-, S-,  
537 and P-containing transformations with land use, mineralogy, and vegetation; or investigating  
538 relationships between microbial activity and metabolome composition. We encourage the scientific  
539 community to explore WHONDORS datasets and combine them with additional data products to  
540 pursue novel scientific questions at local to global scales and to further engage with and pursue  
541 science that embodies the ICON principles.

542 **Supplementary Materials:** The following are available online at [www.mdpi.com/xxx/s1](http://www.mdpi.com/xxx/s1). Table S1: This table  
543 contains by-sample mean, median, and standard deviation for molecular characteristics (i.e., aromaticity index,  
544 H:C ratios, etc.; Sheet (1), the number of metabolites belonging to a given elemental group (i.e., CHON, CHO;  
545 Sheet (2), and the number of metabolites belonging to some compound class (i.e., %lignin-like, %protein-like,  
546 etc.; Sheet (3); Sheet (4), information about how each of the different measurements was calculated. Figure S1:  
547 Principal component analysis (PCA) performed on all peaks, regardless of formula assignment. Table S2:  
548 Loadings for PCA performed on all peaks. PC1 loadings on the x-axis are presented in Column A, while PC2  
549 loadings on the y-axis are presented in Column B. Table S3: Loadings for PCA performed peaks with molecular  
550 formula assigned. PC1 loadings on the x-axis are presented in Column A, while PC2 loadings on the y-axis are  
551 presented in Column B. Table S4: This spreadsheet contains meta-data for each site from which samples were  
552 collected, including (but not limited to) latitude, longitude, stream order, and sampling date. Table S5: This table  
553 contains the results of the FDR-corrected, two-sided Mann–Whitney statistics performed to evaluate spatial

554 variability across the contiguous United States of America. Table S6: Table of non-purgeable organic carbon  
555 (NPOC) concentrations for surface water and sediment-water extractions. Table S7: The file is the database of  
556 transformations used in the transformation analysis. The first column represents the transformation label, while  
557 the second column is the corresponding mass difference. There are two types of transformations listed in this  
558 file: (1) the gain or loss of the listed molecular formula (e.g., C<sub>1</sub>H<sub>1</sub>O<sub>1</sub>N<sub>1</sub>), with numeric values indicating the  
559 number of atoms associated with the element that precedes the numeric value; and (2) a substitution reaction  
560 denoted by an underscore (e.g., C<sub>1</sub>H<sub>1</sub>N<sub>1</sub>O<sub>-1</sub>). In the case of a substitution reaction, the underscore connects the  
561 element lost to the number of atoms lost. For example, C<sub>1</sub>H<sub>1</sub>N<sub>1</sub>O<sub>-1</sub> indicates that a molecule gained C<sub>1</sub>H<sub>1</sub>N<sub>1</sub>  
562 and lost one O atom. Some substitution reactions include multiple elements that are lost such that there are  
563 multiple underscores. In all cases, an underscore connects the element lost to the number of atoms lost. In all  
564 cases, atoms are gained if they are not followed immediately by an underscore. For example, C<sub>-1</sub>H<sub>4</sub>O<sub>2</sub>  
565 indicates loss of one C, loss of four H, and gain of two O. If no numeric value follows an element, it indicates  
566 that there is a gain of a single atom of that element (e.g., CH<sub>2</sub> indicates one atom of C). File S1: A compressed  
567 file containing all of the maps generated during the spatial analysis of the contiguous United States of America.

568 **Author Contributions:** V.A.G.-C., R.E.D., E.B.G., and J.C.S., conceptualized the study; V.A.G.-C., L.R., J.W.,  
569 J.M.T., M.M., A.E.G., S.K., and S.F. carried out sample processing; C.T.R., R.K.C., and J.T. conducted the  
570 instrumental analyses; V.A.G.-C., R.E.D., J.C.S., and E.B.G. drafted the manuscript; and all authors contributed  
571 to the writing. All authors have read and agreed to the published version of the manuscript.

572 **Funding:** This research was supported by the U.S. Department of Energy (DOE), Office of Biological and  
573 Environmental Research (BER), as part of the Subsurface Biogeochemical Research Program's Scientific Focus  
574 Area (SFA) at the Pacific Northwest National Laboratory (PNNL). Data were generated under the EMSL User  
575 Proposal 51180. A portion of the research was performed at Environmental Molecular Science Laboratory User  
576 Facility. PNNL is operated for DOE by Battelle under Contract DE-AC06-76RLO 1830.

577 **Acknowledgments:** The authors would like to thank the WHONDERS consortium.

578 **Conflicts of Interest:** The authors declare no conflict of interest.

## 579 **References**

- 580 1. Battin, T.J.; Luyssaert, S.; Kaplan, L.A.; Aufdenkampe, A.K.; Richter, A.; Tranvik, L.J. The boundless carbon  
581 cycle. *Nat. Geosci.* **2009**, *2*, 598–600, doi:10.1038/ngeo618.
- 582 2. Cole, J.J.; Prairie, Y.T.; Caraco, N.F.; McDowell, W.H.; Tranvik, L.J.; Striegl, R.G.; Duarte, C.M.; Kortelainen,  
583 P.; Downing, J.A.; Middelburg, J.J.; et al. Plumbing the Global Carbon Cycle: Integrating Inland Waters into  
584 the Terrestrial Carbon Budget. *Ecosystems* **2007**, *10*, 172–185, doi:10.1007/s10021-006-9013-8.
- 585 3. Marín-Spiotta, E.; Gruley, K.E.; Crawford, J.; Atkinson, E.E.; Miesel, J.R.; Greene, S.; Cardona-Correa, C.;  
586 Spencer, R.G.M. Paradigm shifts in soil organic matter research affect interpretations of aquatic carbon  
587 cycling: Transcending disciplinary and ecosystem boundaries. *Biogeochemistry* **2014**, *117*, 279–297,  
588 doi:10.1007/s10533-013-9949-7.

- 589 4. Regnier, P.; Friedlingstein, P.; Ciais, P.; Mackenzie, F.T.; Gruber, N.; Janssens, I.A.; Laruelle, G.G.;  
590 Lauerwald, R.; Luyssaert, S.; Andersson, A.J.; et al. Anthropogenic perturbation of the carbon fluxes from  
591 land to ocean. *Nat. Geosci.* **2013**, *6*, 597–607, doi:10.1038/ngeo1830.
- 592 5. Hotchkiss, E.R.; Hall, R.O., Jr.; Sponseller, R.A.; Butman, D.; Klaminder, J.; Laudon, H.; Rosvall, M.;  
593 Karlsson, J. Sources of and processes controlling CO<sub>2</sub> emissions change with the size of streams and rivers.  
594 *Nat. Geosci.* **2015**, *8*, 696–699, doi:10.1038/ngeo2507.
- 595 6. Catalán, N.; Casas-Ruiz, J.P.; Arce, M.I.; Abril, M.; Bravo, A.G.; Campo, R. del; Estévez, E.; Freixa, A.;  
596 Giménez-Grau, P.; González-Ferreras, A.M.; et al. Behind the Scenes: Mechanisms Regulating Climatic  
597 Patterns of Dissolved Organic Carbon Uptake in Headwater Streams. *Glob. Biogeochem. Cycles* **2018**, *32*,  
598 1528–1541, doi:10.1029/2018GB005919.
- 599 7. Aufdenkampe, A.K.; Mayorga, E.; Raymond, P.A.; Melack, J.M.; Doney, S.C.; Alin, S.R.; Aalto, R.E.; Yoo,  
600 K. Riverine coupling of biogeochemical cycles between land, oceans, and atmosphere. *Front. Ecol. Environ.*  
601 **2011**, *9*, 53–60, doi:10.1890/100014.
- 602 8. Raymond, P.A.; Hartmann, J.; Lauerwald, R.; Sobek, S.; McDonald, C.; Hoover, M.; Butman, D.; Striegl, R.;  
603 Mayorga, E.; Humborg, C.; et al. Global carbon dioxide emissions from inland waters. *Nature* **2013**, *503*,  
604 355–359, doi:10.1038/nature12760.
- 605 9. Moody, C.S.; Worrall, F.; Evans, C.D.; Jones, T.G. The rate of loss of dissolved organic carbon (DOC)  
606 through a catchment. *J. Hydrol.* **2013**, *492*, 139–150, doi:10.1016/j.jhydrol.2013.03.016.
- 607 10. Cory, R.M.; Ward, C.P.; Crump, B.C.; Kling, G.W. Sunlight controls water column processing of carbon in  
608 arctic fresh waters. *Science* **2014**, *345*, 925, doi:10.1126/science.1253119.
- 609 11. Newbold, J.D.; Bott, T.L.; Kaplan, L.A.; Dow, C.L.; Jackson, J.K.; Aufdenkampe, A.K.; Martin, L.A.; Horn,  
610 D.J.V.; Long, A.A. Uptake of nutrients and organic C in streams in New York City drinking-water-supply  
611 watersheds. *Freshw. Sci.* **2006**, *25*, 998–1017, doi:10.1899/0887-3593(2006)025[0998:UONAOC]2.0.CO;2.
- 612 12. Bernhardt, E.S.; McDowell, W.H. Twenty years apart: Comparisons of DOM uptake during leaf leachate  
613 releases to Hubbard Brook Valley streams in 1979 versus 2000. *J. Geophys. Res. Biogeosci.* **2008**, *113*,  
614 doi:10.1029/2007JG000618.
- 615 13. Koehler, B.; Wachenfeldt, E. von; Kothawala, D.; Tranvik, L.J. Reactivity continuum of dissolved organic  
616 carbon decomposition in lake water. *J. Geophys. Res. Biogeosci.* **2012**, *117*, doi:10.1029/2011JG001793.
- 617 14. Berggren, M.; Giorgio, P.A. del Distinct patterns of microbial metabolism associated to riverine dissolved  
618 organic carbon of different source and quality. *J. Geophys. Res. Biogeosci.* **2015**, *120*, 989–999,  
619 doi:10.1002/2015JG002963.
- 620 15. Stegen, J.C.; Johnson, T.; Fredrickson, J.K.; Wilkins, M.J.; Konopka, A.E.; Nelson, W.C.; Arntzen, E.V.;  
621 Chrisler, W.B.; Chu, R.K.; Fansler, S.J.; et al. Influences of organic carbon speciation on hyporheic corridor  
622 biogeochemistry and microbial ecology. *Nat. Commun.* **2018**, *9*, 1034, doi:10.1038/s41467-018-02922-9.
- 623 16. Garayburu-Caruso, V.A.; Stegen, J.C.; Song, H.-S.; Renteria, L.; Wells, J.; Garcia, W.; Resch, C.T.; Goldman,  
624 A.E.; Chu, R.K.; Toyoda, J.; et al. Carbon Limitation Leads to Thermodynamic Regulation of Aerobic  
625 Metabolism. *Environ. Sci. Technol. Lett.* **2020**, *7*, 517–524, doi:10.1021/acs.estlett.0c00258.
- 626 17. Graham, E.B.; Crump, A.R.; Kennedy, D.W.; Arntzen, E.; Fansler, S.; Purvine, S.O.; Nicora, C.D.; Nelson,  
627 W.; Tfaily, M.M.; Stegen, J.C. Multi 'omics comparison reveals metabolome biochemistry, not microbiome

- 628 composition or gene expression, corresponds to elevated biogeochemical function in the hyporheic zone.  
629 *Sci. Total Environ.* **2018**, 642, 742–753, doi:10.1016/j.scitotenv.2018.05.256.
- 630 18. Graham, E.B.; Tfaily, M.M.; Crump, A.R.; Goldman, A.E.; Bramer, L.M.; Arntzen, E.; Romero, E.; Resch,  
631 C.T.; Kennedy, D.W.; Stegen, J.C. Carbon Inputs From Riparian Vegetation Limit Oxidation of Physically  
632 Bound Organic Carbon Via Biochemical and Thermodynamic Processes. *J. Geophys. Res. Biogeosci.* **2017**, 122,  
633 3188–3205, doi:10.1002/2017JG003967.
- 634 19. Bundy, J.G.; Davey, M.P.; Viant, M.R. Environmental metabolomics: A critical review and future  
635 perspectives. *Metabolomics* **2008**, 5, 3, doi:10.1007/s11306-008-0152-0.
- 636 20. Rue, G.P.; Rock, N.D.; Gabor, R.S.; Pitlick, J.; Tfaily, M.; McKnight, D.M. Concentration-discharge  
637 relationships during an extreme event: Contrasting behavior of solutes and changes to chemical quality of  
638 dissolved organic material in the Boulder Creek Watershed during the September 2013 flood. *Water Resour.*  
639 *Res.* **2017**, 53, 5276–5297, doi:10.1002/2016WR019708.
- 640 21. Wilson, R.M.; Tfaily, M.M. Advanced Molecular Techniques Provide New Rigorous Tools for  
641 Characterizing Organic Matter Quality in Complex Systems. *J. Geophys. Res. Biogeosci.* **2018**, 123, 1790–1795,  
642 doi:10.1029/2018JG004525.
- 643 22. Li, L.; He, Z.L.; Tfaily, M.M.; Inglett, P.; Stoffella, P.J. Spatial-temporal variations of dissolved organic  
644 nitrogen molecular composition in agricultural runoff water. *Water Res.* **2018**, 137, 375–383,  
645 doi:10.1016/j.watres.2018.01.035.
- 646 23. Walker, L.R.; Tfaily, M.M.; Shaw, J.B.; Hess, N.J.; Paša-Tolić, L.; Koppelaar, D.W. Unambiguous  
647 identification and discovery of bacterial siderophores by direct injection 21 Tesla Fourier transform ion  
648 cyclotron resonance mass spectrometry. *Metallomics* **2017**, 9, 82–92, doi:10.1039/C6MT00201C.
- 649 24. Hodgkins, S.B.; Tfaily, M.M.; McCalley, C.K.; Logan, T.A.; Crill, P.M.; Saleska, S.R.; Rich, V.I.; Chanton, J.P.  
650 Changes in peat chemistry associated with permafrost thaw increase greenhouse gas production. *Proc. Natl.*  
651 *Acad. Sci. USA* **2014**, 111, 5819–5824, doi:10.1073/pnas.1314641111.
- 652 25. Jones, O.A.H.; Lear, G.; Welji, A.M.; Collins, G.; Quince, C. Community Metabolomics in Environmental  
653 Microbiology. In *Microbial Metabolomics: Applications in Clinical, Environmental, and Industrial Microbiology*;  
654 Beale, D.J., Kouremenos, K.A., Palombo, E.A., Eds.; Springer International Publishing: Cham, Switzerland,  
655 2016; pp. 199–224. ISBN 978-3-319-46326-1.
- 656 26. Jones, O.A.H.; Sdepanian, S.; Lofts, S.; Svendsen, C.; Spurgeon, D.J.; Maguire, M.L.; Griffin, J.L.  
657 Metabolomic analysis of soil communities can be used for pollution assessment. *Environ. Toxicol. Chem.*  
658 **2014**, 33, 61–64, doi:10.1002/etc.2418.
- 659 27. Beale, D.J.; Crosswell, J.; Karpe, A.V.; Metcalfe, S.S.; Morrison, P.D.; Staley, C.; Ahmed, W.; Sadowsky, M.J.;  
660 Palombo, E.A.; Steven, A.D.L. Seasonal metabolic analysis of marine sediments collected from Moreton  
661 Bay in South East Queensland, Australia, using a multi-omics-based approach. *Sci. Total Environ.* **2018**, 631–  
662 632, 1328–1341, doi:10.1016/j.scitotenv.2018.03.106.
- 663 28. Beale, D.J.; Crosswell, J.; Karpe, A.V.; Ahmed, W.; Williams, M.; Morrison, P.D.; Metcalfe, S.; Staley, C.;  
664 Sadowsky, M.J.; Palombo, E.A.; et al. A multi-omics based ecological analysis of coastal marine sediments  
665 from Gladstone, in Australia’s Central Queensland, and Heron Island, a nearby fringing platform reef. *Sci.*  
666 *Total Environ.* **2017**, 609, 842–853, doi:10.1016/j.scitotenv.2017.07.184.



- 667 29. Shah, R.M.; Crosswell, J.; Metcalfe, S.S.; Carlin, G.; Morrison, P.D.; Karpe, A.V.; Palombo, E.A.; Steven,  
668 A.D.L.; Beale, D.J. Influence of Human Activities on Broad-Scale Estuarine-Marine Habitats Using Omics-  
669 Based Approaches Applied to Marine Sediments. *Microorganisms* **2019**, *7*,  
670 doi:10.3390/microorganisms7100419.
- 671 30. Kimes, N.E.; Callaghan, A.V.; Aktas, D.F.; Smith, W.L.; Sunner, J.; Golding, B.; Drozdowska, M.; Hazen,  
672 T.C.; Suflita, J.M.; Morris, P.J. Metagenomic analysis and metabolite profiling of deep-sea sediments from  
673 the Gulf of Mexico following the Deepwater Horizon oil spill. *Front. Microbiol.* **2013**, *4*, 50,  
674 doi:10.3389/fmicb.2013.00050.
- 675 31. Lam, B.; Baer, A.; Alae, M.; Lefebvre, B.; Moser, A.; Williams, A.; Simpson, A.J. Major Structural  
676 Components in Freshwater Dissolved Organic Matter. *Environ. Sci. Technol.* **2007**, *41*, 8240–8247,  
677 doi:10.1021/es0713072.
- 678 32. Jaffé, R.; McKnight, D.; Maie, N.; Cory, R.; McDowell, W.H.; Campbell, J.L. Spatial and temporal variations  
679 in DOM composition in ecosystems: The importance of long-term monitoring of optical properties. *J.*  
680 *Geophys. Res. Biogeosci.* **2008**, *113*, doi:10.1029/2008JG000683.
- 681 33. Gonsior, M.; Peake, B.M.; Cooper, W.T.; Podgorski, D.; D’Andrilli, J.; Cooper, W.J. Photochemically  
682 induced changes in dissolved organic matter identified by ultrahigh resolution fourier transform ion  
683 cyclotron resonance mass spectrometry. *Environ. Sci. Technol.* **2009**, *43*, 698–703, doi:10.1021/es8022804.
- 684 34. Lu, Y.; Li, X.; Mesfioui, R.; Bauer, J.E.; Chambers, R.M.; Canuel, E.A.; Hatcher, P.G. Use of ESI-FTICR-MS  
685 to Characterize Dissolved Organic Matter in Headwater Streams Draining Forest-Dominated and Pasture-  
686 Dominated Watersheds. *PLoS ONE* **2015**, *10*, e0145639, doi:10.1371/journal.pone.0145639.
- 687 35. Stegen, J.C.; Goldman, A.E. WHONDORS: A Community Resource for Studying Dynamic River Corridors.  
688 *mSystems* **2018**, *3*, doi:10.1128/mSystems.00151-18.
- 689 36. Jaffé, R.; Yamashita, Y.; Maie, N.; Cooper, W.T.; Dittmar, T.; Dodds, W.K.; Jones, J.B.; Myoshi, T.; Ortiz-  
690 Zayas, J.R.; Podgorski, D.C.; et al. Dissolved Organic Matter in Headwater Streams: Compositional  
691 Variability across Climatic Regions of North America. *Geochim. Cosmochim. Acta* **2012**, *94*, 95–108,  
692 doi:10.1016/j.gca.2012.06.031.
- 693 37. Wagner, S.; Riedel, T.; Niggemann, J.; Vähätalo, A.V.; Dittmar, T.; Jaffé, R. Linking the Molecular Signature  
694 of Heteroatomic Dissolved Organic Matter to Watershed Characteristics in World Rivers. *Environ. Sci.*  
695 *Technol.* **2015**, *49*, 13798–13806, doi:10.1021/acs.est.5b00525.
- 696 38. Danczak, R.E.; Goldman, A.E.; Chu, R.K.; Toyoda, J.G.; Garayburu-Caruso, V.A.; Tolić, N.; Graham, E.B.;  
697 Morad, J.W.; Renteria, L.; Wells, J.R.; et al. Ecological theory applied to environmental metabolomes reveals  
698 compositional divergence despite conserved molecular properties. *bioRxiv* **2020**,  
699 doi:10.1101/2020.02.12.946459.
- 700 39. Steefel, C.I.; Appelo, C.A.J.; Arora, B.; Jacques, D.; Kalbacher, T.; Kolditz, O.; Lagneau, V.; Lichtner, P.C.;  
701 Mayer, K.U.; Meeussen, J.C.L.; et al. Reactive transport codes for subsurface environmental simulation.  
702 *Comput. Geosci.* **2015**, *19*, 445–478, doi:10.1007/s10596-014-9443-x.
- 703 40. Song, H.-S.; Stegen, J.C.; Graham, E.B.; Lee, J.-Y.; Garayburu-Caruso, V.A.; Nelson, W.C.; Chen, X.;  
704 Moulton, J.D.; Scheibe, T.D. Representing Organic Matter Thermodynamics in Biogeochemical Reactions  
705 via Substrate-Explicit Modeling. *bioRxiv* **2020**, doi:10.1101/2020.02.27.968669.

- 706 41. Stegen, J.; Brodie, E.; Wrighton, K.; Bayer, P.; Lesmes, D.; Emani, S.; Moerman, J. *Open Watershed Science by*  
707 *Design: Leveraging Distributed Research Networks to Understand Watershed Systems: Workshop Report, DOE/SC-*  
708 *0200*; USDOE Office of Science (SC): USA, **2019**, [doesbr.org/openwatersheds/](https://doesbr.org/openwatersheds/).
- 709 42. Uhlmann, E.L.; Ebersole, C.R.; Chartier, C.R.; Errington, T.M.; Kidwell, M.C.; Lai, C.K.; McCarthy, R.J.;  
710 Riegelman, A.; Silberzahn, R.; Nosek, B.A. Scientific Utopia III: Crowdsourcing Science: *Perspect. Psychol.*  
711 *Sci.* **2019**, doi:10.1177/1745691619850561.
- 712 43. Wilkinson, M.D.; Dumontier, M.; Aalbersberg, I.J.J.; Appleton, G.; Axton, M.; Baak, A.; Blomberg, N.;  
713 Boiten, J.-W.; da Silva Santos, L.B.; Bourne, P.E.; et al. The FAIR Guiding Principles for scientific data  
714 management and stewardship. *Sci. Data* **2016**, *3*, 160018, doi:10.1038/sdata.2016.18.
- 715 44. Toyoda, J.G.; Goldman, A.E.; Chu, R.K.; Danczak, R.E.; Daly, R.A.; Garayburu-Caruso, V.A.; Graham, E.B.;  
716 Lin, X.; Moran, J.J.; Ren, H. *WHONDRS Summer 2019 Sampling Campaign: Global River Corridor Surface Water*  
717 *FTICR-MS and Stable Isotopes*; Environmental System Science Data Infrastructure for a Virtual Ecosystem,  
718 Worldwide Hydrobiogeochemistry Observation Network for Dynamic River Systems (WHONDRS): **2020**,  
719 doi:10.15485/1603775
- 720 45. Koch, B.P.; Dittmar, T. From mass to structure: An aromaticity index for high-resolution mass data of  
721 natural organic matter. *Rapid Commun. Mass Spectrom.* **2006**, *20*, 926–932, doi:10.1002/rcm.2386.
- 722 46. Koch, B.P.; Dittmar, T. From mass to structure: An aromaticity index for high-resolution mass data of  
723 natural organic matter. *Rapid Commun. Mass Spectrom.* **2016**, *30*, 250–250, doi:10.1002/rcm.7433.
- 724 47. Willoughby, A.S.; Wozniak, A.S.; Hatcher, P.G. A molecular-level approach for characterizing water-  
725 insoluble components of ambient organic aerosol particulates using ultrahigh-resolution mass  
726 spectrometry. *Atmos. Chem. Phys.* **2014**, *14*, 10299–10314, doi:10.5194/acp-14-10299-2014.
- 727 48. LaRowe, D.E.; Van Cappellen, P. Degradation of natural organic matter: A thermodynamic analysis.  
728 *Geochim. Cosmochim. Acta* **2011**, *75*, 2030–2042, doi:10.1016/j.gca.2011.01.020.
- 729 49. Boye, K.; Noël, V.; Tfaily, M.M.; Bone, S.E.; Williams, K.H.; Bargar, J.R.; Fendorf, S. Thermodynamically  
730 controlled preservation of organic carbon in floodplains. *Nat. Geosci.* **2017**, *10*, 415–419,  
731 doi:10.1038/ngeo2940.
- 732 50. Kim, S.; Kramer, R.W.; Hatcher, P.G. Graphical Method for Analysis of Ultrahigh-Resolution Broadband  
733 Mass Spectra of Natural Organic Matter, the Van Krevelen Diagram. *Anal. Chem.* **2003**, *75*, 5336–5344,  
734 doi:10.1021/ac034415p.
- 735 51. Hedges, J.I.; Mann, D.C. The lignin geochemistry of marine sediments from the southern Washington coast.  
736 *Geochim. Cosmochim. Acta* **1979**, *43*, 1809–1818, doi:10.1016/0016-7037(79)90029-2.
- 737 52. Stegen, J.C.; Fredrickson, J.K.; Wilkins, M.J.; Konopka, A.E.; Nelson, W.C.; Arntzen, E.V.; Chrisler, W.B.;  
738 Chu, R.K.; Danczak, R.E.; Fansler, S.J.; et al. Groundwater–surface water mixing shifts ecological assembly  
739 processes and stimulates organic carbon turnover. *Nat. Commun.* **2016**, *7*, 11237, doi:10.1038/ncomms11237.
- 740 53. Pracht, L.E.; Tfaily, M.M.; Ardissono, R.J.; Neumann, R.B. Molecular characterization of organic matter  
741 mobilized from Bangladeshi aquifer sediment: Tracking carbon compositional change during microbial  
742 utilization. *Biogeosciences* **2018**, *15*, 1733–1747, doi:10.5194/bg-15-1733-2018.

- 743 54. Valle, J.; Harir, M.; Gonsior, M.; Enrich-Prast, A.; Schmitt-Kopplin, P.; Bastviken, D.; Hertkorn, N.  
744 Molecular differences between water column and sediment pore water SPE-DOM in ten Swedish boreal  
745 lakes. *Water Res.* **2020**, *170*, 115320, doi:10.1016/j.watres.2019.115320.
- 746 55. Boulton, A.J.; Findlay, S.; Marmonier, P.; Stanley, E.H.; Valett, H.M. The functional significance of the  
747 hyporheic zone in streams and rivers. *Annu. Rev. Ecol. Syst.* **1998**, *29*, 59–81,  
748 doi:10.1146/annurev.ecolsys.29.1.59.
- 749 56. Boano, F.; Harvey, J.W.; Marion, A.; Packman, A.I.; Revelli, R.; Ridolfi, L.; Wörman, A. Hyporheic flow and  
750 transport processes: Mechanisms, models, and biogeochemical implications. *Rev. Geophys.* **2014**, *52*, 603–  
751 679, doi:10.1002/2012RG000417.
- 752 57. Harvey, J.; Gooseff, M. River corridor science: Hydrologic exchange and ecological consequences from  
753 bedforms to basins. *Water Resour. Res.* **2015**, *51*, 6893–6922, doi:10.1002/2015WR017617.
- 754 58. Gomez-Velez, J.D.; Harvey, J.W.; Cardenas, M.B.; Kiel, B. Denitrification in the Mississippi River network  
755 controlled by flow through river bedforms. *Nat. Geosci.* **2015**, *8*, 941–945, doi:10.1038/ngeo2567.
- 756 59. Knapp, J.L.A.; González-Pinzón, R.; Drummond, J.D.; Larsen, L.G.; Cirpka, O.A.; Harvey, J.W. Tracer-based  
757 characterization of hyporheic exchange and benthic biolayers in streams. *Water Resour. Res.* **2017**, *53*, 1575–  
758 1594, doi:10.1002/2016WR019393.
- 759 60. Fischer, H.; Kloep, F.; Wilczek, S.; Pusch, M.T. A river's liver—microbial processes within the hyporheic  
760 zone of a large lowland river. *Biogeochemistry* **2005**, *76*, 349–371.
- 761 61. Battin, T.J.; Besemer, K.; Bengtsson, M.M.; Romani, A.M.; Packmann, A.I. The ecology and biogeochemistry  
762 of stream biofilms. *Nat. Rev. Microbiol.* **2016**, *14*, 251.
- 763 62. Bailey, V.L.; Smith, A.P.; Tfaily, M.; Fansler, S.J.; Bond-Lamberty, B. Differences in soluble organic carbon  
764 chemistry in pore waters sampled from different pore size domains. *Soil Biol. Biochem.* **2017**, *107*, 133–143,  
765 doi:10.1016/j.soilbio.2016.11.025.
- 766 63. Cory, R.M.; Kling, G.W. Interactions between sunlight and microorganisms influence dissolved organic  
767 matter degradation along the aquatic continuum. *Limnol. Oceanogr. Lett.* **2018**, *3*, 102–116,  
768 doi:10.1002/lol2.10060.
- 769 64. Bao, H.; Niggemann, J.; Huang, D.; Dittmar, T.; Kao, S.-J. Different Responses of Dissolved Black Carbon  
770 and Dissolved Lignin to Seasonal Hydrological Changes and an Extreme Rain Event. *J. Geophys. Res.*  
771 *Biogeosciences* **2019**, *124*, 479–493, doi:10.1029/2018JG004822.
- 772 65. Fellman, J.B.; Hood, E.; Edwards, R.T.; D'Amore, D.V. Changes in the concentration, biodegradability, and  
773 fluorescent properties of dissolved organic matter during stormflows in coastal temperate watersheds. *J.*  
774 *Geophys. Res. Biogeosci.* **2009**, *114*, doi:10.1029/2008JG000790.
- 775 66. Hood, E.; Gooseff, M.N.; Johnson, S.L. Changes in the character of stream water dissolved organic carbon  
776 during flushing in three small watersheds, Oregon. *J. Geophys. Res. Biogeosci.* **2006**, *111*,  
777 doi:10.1029/2005JG000082.
- 778 67. Ward, N.D.; Richey, J.E.; Keil, R.G. Temporal variation in river nutrient and dissolved lignin phenol  
779 concentrations and the impact of storm events on nutrient loading to Hood Canal, Washington, USA.  
780 *Biogeochemistry* **2012**, *111*, 629–645, doi:10.1007/s10533-012-9700-9.

- 781 68. Tfaily, M.M.; Chu, R.K.; Toyoda, J.; Tolić, N.; Robinson, E.W.; Paša-Tolić, L.; Hess, N.J. Sequential extraction  
782 protocol for organic matter from soils and sediments using high resolution mass spectrometry. *Anal. Chim.*  
783 *Acta* **2017**, *972*, 54–61, doi:10.1016/j.aca.2017.03.031.
- 784 69. Kaling, M.; Schmidt, A.; Moritz, F.; Rosenkranz, M.; Witting, M.; Kasper, K.; Janz, D.; Schmitt-Kopplin, P.;  
785 Schnitzler, J.-P.; Polle, A. Mycorrhiza-Triggered Transcriptomic and Metabolomic Networks Impinge on  
786 Herbivore Fitness. *Plant Physiol.* **2018**, *176*, 2639–2656, doi:10.1104/pp.17.01810.
- 787 70. Moritz, F.; Kaling, M.; Schnitzler, J.-P.; Schmitt-Kopplin, P. Characterization of poplar metabotypes via  
788 mass difference enrichment analysis. *Plant Cell Environ.* **2017**, *40*, 1057–1073, doi:10.1111/pce.12878.
- 789 71. Craine, J.M.; Morrow, C.; Fierer, N. Microbial Nitrogen Limitation Increases Decomposition. *Ecology* **2007**,  
790 *88*, 2105–2113, doi:10.1890/06-1847.1.
- 791 72. Moorhead, D.L.; Sinsabaugh, R.L. A Theoretical Model of Litter Decay and Microbial Interaction. *Ecol.*  
792 *Monogr.* **2006**, *76*, 151–174, doi:10.1890/0012-9615(2006)076[0151:ATMOLD]2.0.CO;2.
- 793 73. Zhao, F.J.; Wu, J.; McGrath, S.P. Chapter 12—Soil Organic Sulphur and its Turnover. In *Humic Substances*  
794 *in Terrestrial Ecosystems*; Piccolo, A., Ed.; Elsevier Science B.V.: Amsterdam, The Netherlands, 1996; pp. 467–  
795 506. ISBN 978-0-444-81516-3.
- 796 74. Reddy, K.R.; Kadlec, R.H.; Flaig, E.; Gale, P.M. Phosphorus Retention in Streams and Wetlands: A Review.  
797 *Crit. Rev. Environ. Sci. Technol.* **1999**, *29*, 83–146, doi:10.1080/10643389991259182.
- 798 75. Freixa, A.; Ejarque, E.; Crognale, S.; Amalfitano, S.; Fazi, S.; Butturini, A.; Romaní, A.M. Sediment microbial  
799 communities rely on different dissolved organic matter sources along a Mediterranean river continuum.  
800 *Limnol. Oceanogr.* **2016**, *61*, 1389–1405, doi:10.1002/lno.10308.
- 801 76. Vazquez, E.; Amalfitano, S.; Fazi, S.; Butturini, A. Dissolved organic matter composition in a fragmented  
802 Mediterranean fluvial system under severe drought conditions. *Biogeochemistry* **2011**, *102*, 59–72,  
803 doi:10.1007/s10533-010-9421-x.
- 804 77. Butturini, A.; Guarch, A.; Romaní, A.M.; Freixa, A.; Amalfitano, S.; Fazi, S.; Ejarque, E. Hydrological  
805 conditions control in situ DOM retention and release along a Mediterranean river. *Water Res.* **2016**, *99*, 33–  
806 45, doi:10.1016/j.watres.2016.04.036.
- 807 78. Ejarque, E.; Freixa, A.; Vazquez, E.; Guarch, A.; Amalfitano, S.; Fazi, S.; Romaní, A.M.; Butturini, A. Quality  
808 and reactivity of dissolved organic matter in a Mediterranean river across hydrological and spatial  
809 gradients. *Sci. Total Environ.* **2017**, 599–600, 1802–1812, doi:10.1016/j.scitotenv.2017.05.113.
- 810 79. Robinson, N.P.; Allred, B.W.; Jones, M.O.; Moreno, A.; Kimball, J.S.; Naugle, D.E.; Erickson, T.A.;  
811 Richardson, A.D. A dynamic Landsat derived normalized difference vegetation index (NDVI) product for  
812 the conterminous United States. *Remote Sens.* **2017**, *9*, 863.
- 813 80. Sayre, R. (Ed.) *A New Map of Standardized Terrestrial Ecosystems of the Conterminous United States*; U.S.  
814 Department of the Interior, U.S. Geological Survey: Reston, VA, USA, 2009; ISBN 978-1-4113-2432-9.
- 815 81. Fierer, N.; Ladau, J.; Clemente, J.C.; Leff, J.W.; Owens, S.M.; Pollard, K.S.; Knight, R.; Gilbert, J.A.; McCulley,  
816 R.L. Reconstructing the Microbial Diversity and Function of Pre-Agricultural Tallgrass Prairie Soils in the  
817 United States. *Science* **2013**, *342*, 621–624, doi:10.1126/science.1243768.

- 818 82. Horton, R.E. Erosional Development of Streams and Their Drainage Basins; Hydrophysical Approach to  
819 Quantitative Morphology. *GSA Bull.* **1945**, *56*, 275–370, doi:10.1130/0016-  
820 7606(1945)56[275:EDOSAT]2.0.CO;2.
- 821 83. Strahler, A.N. Dimensional Analysis Applied to Fluvially Eroded Landforms. *GSA Bull.* **1958**, *69*, 279–300,  
822 doi:10.1130/0016-7606(1958)69[279:DAATFE]2.0.CO;2.
- 823 84. Jensen, B. AOS Protocol and Procedure: Sediment Chemistry Sampling in Wadeable Streams  
824 (NEON.DOC.001193). Available online: <http://data.neonscience.org/documents> (accessed June 2019).
- 825 85. Dittmar, T.; Koch, B.; Hertkorn, N.; Kattner, G. A simple and efficient method for the solid-phase extraction  
826 of dissolved organic matter (SPE-DOM) from seawater: SPE-DOM from seawater. *Limnol. Oceanogr.*  
827 *Methods* **2008**, *6*, 230–235, doi:10.4319/lom.2008.6.230.
- 828 86. Tolić, N.; Liu, Y.; Liyu, A.; Shen, Y.; Tfaily, M.M.; Kujawinski, E.B.; Longnecker, K.; Kuo, L.-J.; Robinson,  
829 E.W.; Paša-Tolić, L.; et al. Formularity: Software for Automated Formula Assignment of Natural and Other  
830 Organic Matter from Ultrahigh-Resolution Mass Spectra. *Anal. Chem.* **2017**, *89*, 12659–12665,  
831 doi:10.1021/acs.analchem.7b03318.
- 832 87. R Core Team. *R: A Language and Environment for Statistical Computing*; R Foundation for Statistical  
833 Computing: Vienna, Austria, **2020**.
- 834 88. Wickham, H. *ggplot2: Elegant Graphics for Data Analysis*; Springer: New York, NY, USA, 2016.
- 835 89. Bramer, L.M.; White, A.M.; Stratton, K.G.; Thompson, A.M.; Claborne, D.; Hofmockel, K.; McCue, L.A.  
836 ftmsRanalysis: An R package for exploratory data analysis and interactive visualization of FT-MS data.  
837 *PLoS Comput. Biol.* **2020**, *16*, e1007654, doi:10.1371/journal.pcbi.1007654.
- 838 90. Oksanen, J.; Blanchet, F.G.; Friendly, M.; Kindt, R.; Legendre, P.; McGlenn, D.; Minchin, P.R.; O'hara, R.;  
839 Simpson, G.L.; Solymos, P. *vegan: Community Ecology Package*. R package version 2.5-6. *Vienna R Found.*  
840 *Stat. Comput. Sch.* **2019**.
- 841 91. Hawkes, J.A.; D'Andrilli, J.; Agar, J.N.; Barrow, M.P.; Berg, S.M.; Catalán, N.; Chen, H.; Chu, R.K.; Cole,  
842 R.B.; Dittmar, T.; et al. An international laboratory comparison of dissolved organic matter composition by  
843 high resolution mass spectrometry: Are we getting the same answer? *Limnol. Oceanogr. Methods* **2020**, *18*,  
844 235–258, doi:10.1002/lom3.10364.
- 845 92. He, C.; Zhang, Y.; Li, Y.; Zhuo, X.; Li, Y.; Zhang, C.; Shi, Q. In-House Standard Method for Molecular  
846 Characterization of Dissolved Organic Matter by FT-ICR Mass Spectrometry. *ACS Omega* **2020**, *5*, 11730–  
847 11736, doi:10.1021/acsomega.0c01055.
- 848 93. Goldman, A.E.; Chu, R.K.; Danczak, R.E.; Daly, R.A.; Fansler, S.; Garayburu-Caruso, V.A.; Graham, E.B.;  
849 McCall, M.L.; Ren, H.; Renteria, L. *WHONDRS Summer 2019 Sampling Campaign: Global River Corridor*  
850 *Sediment FTICR-MS, NPOC, and Aerobic Respiration*; Environmental System Science Data Infrastructure for  
851 a Virtual Ecosystem, Worldwide Hydrobiogeochemistry Observation Network for Dynamic River Systems  
852 (WHONDRS), **2020**, doi:10.15485/1729719

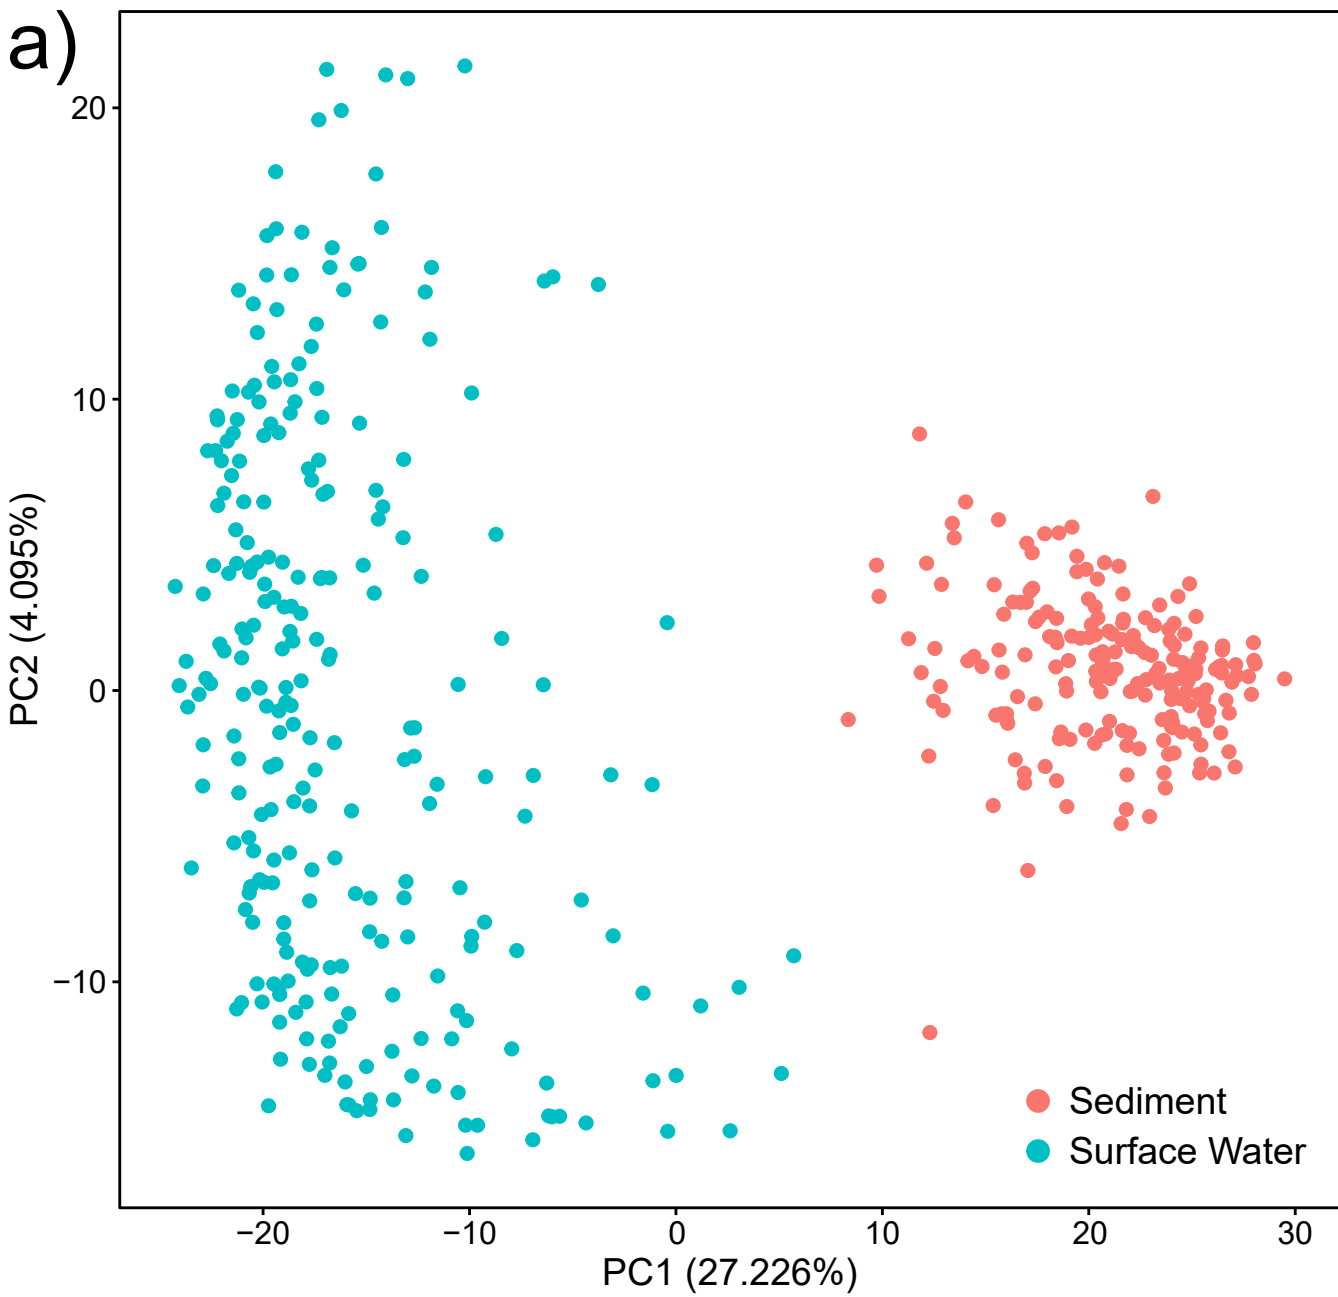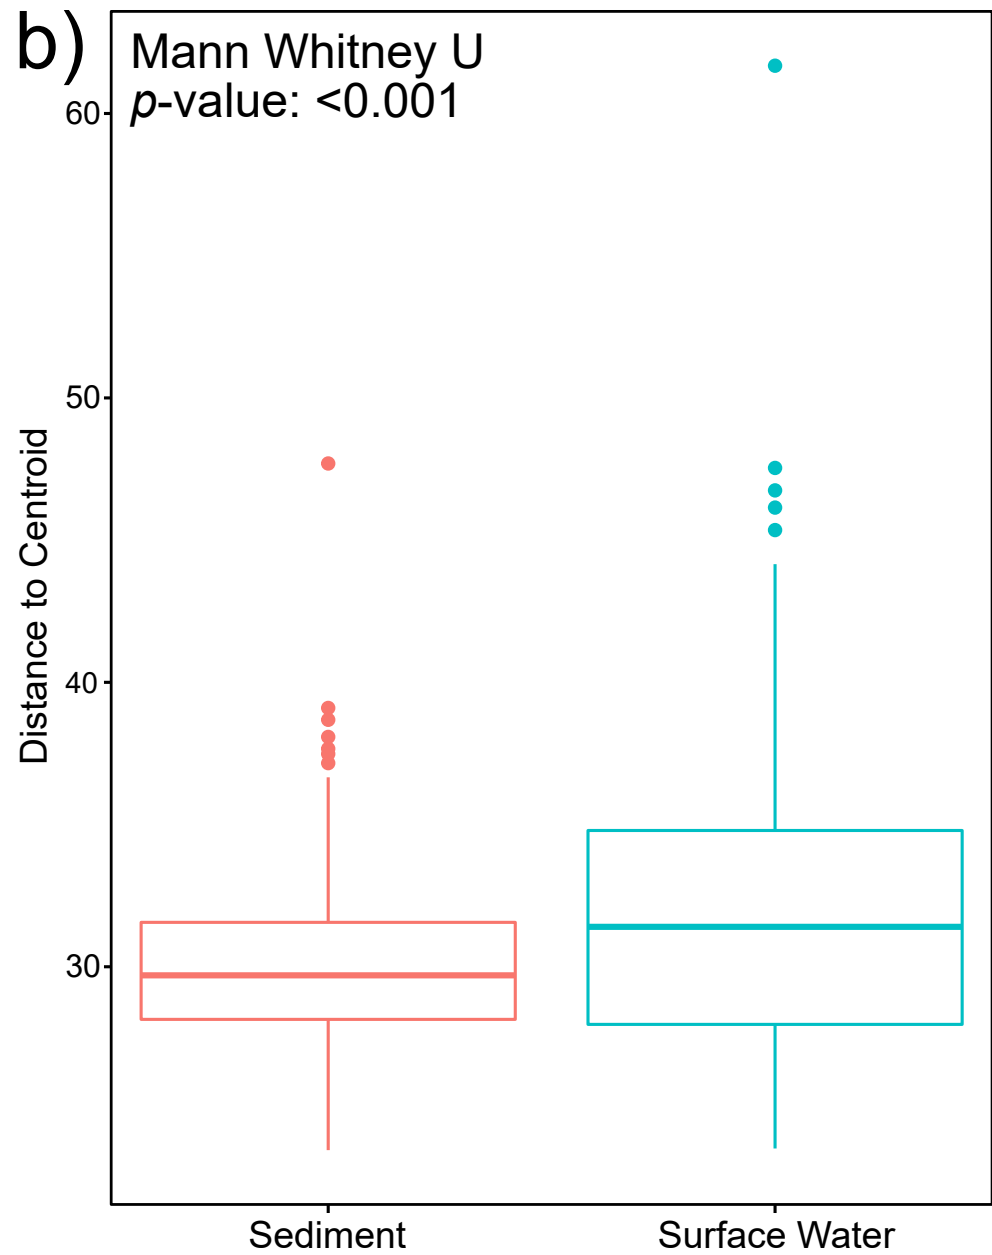

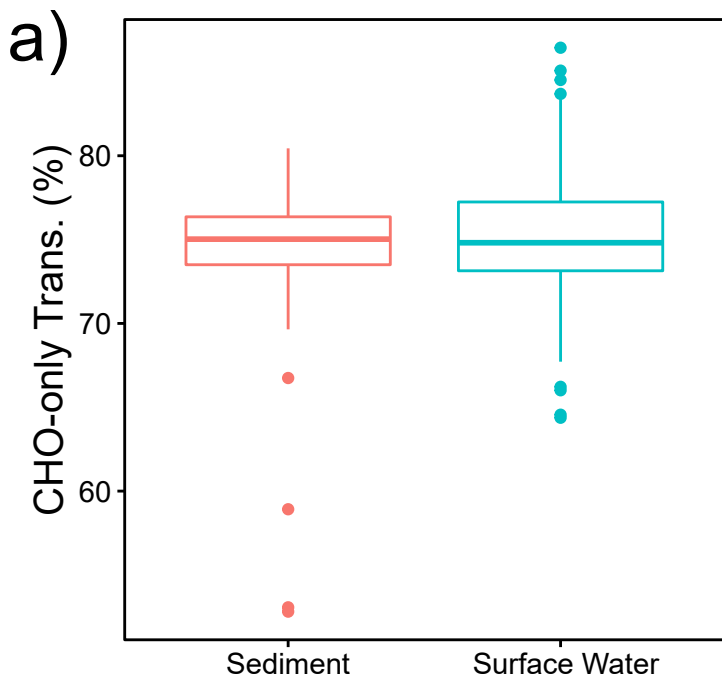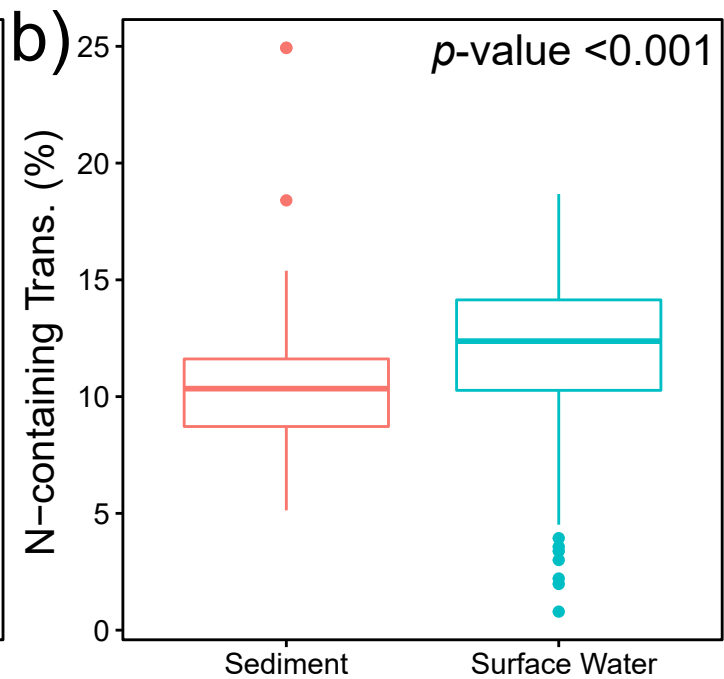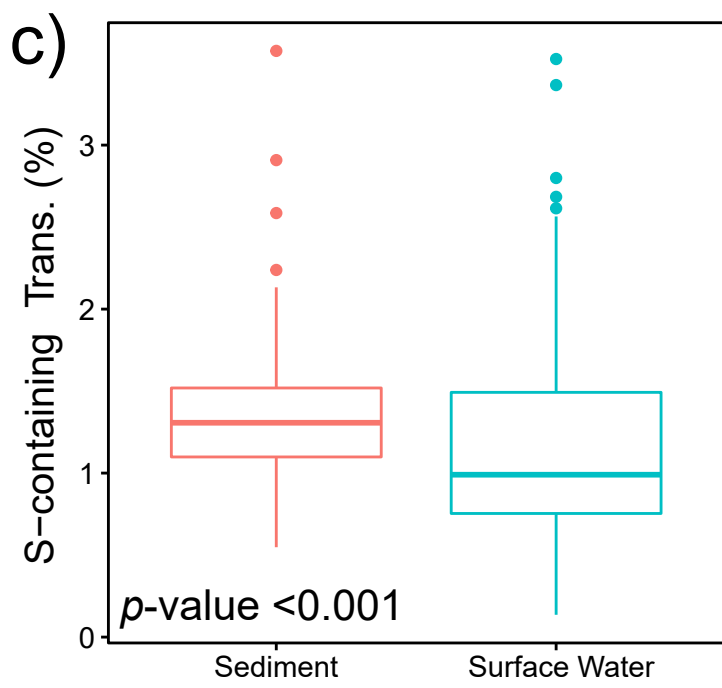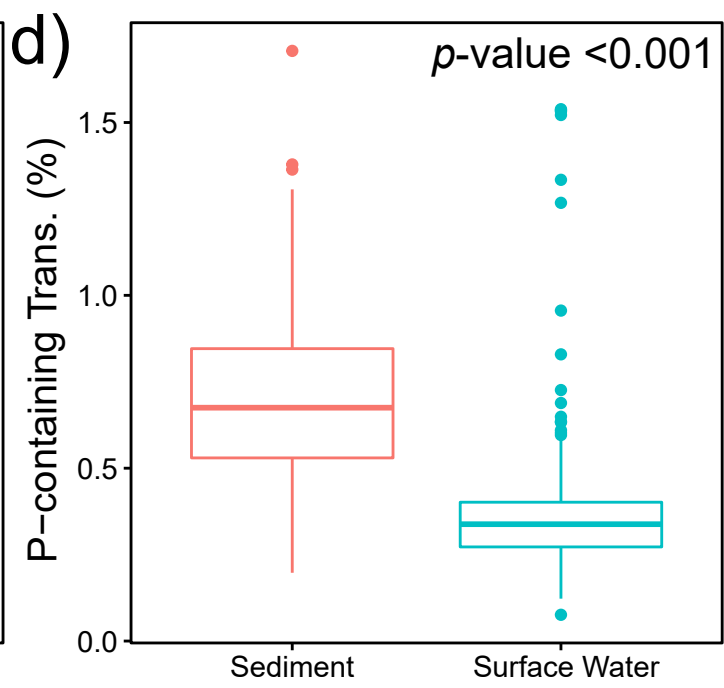

a) Sediment

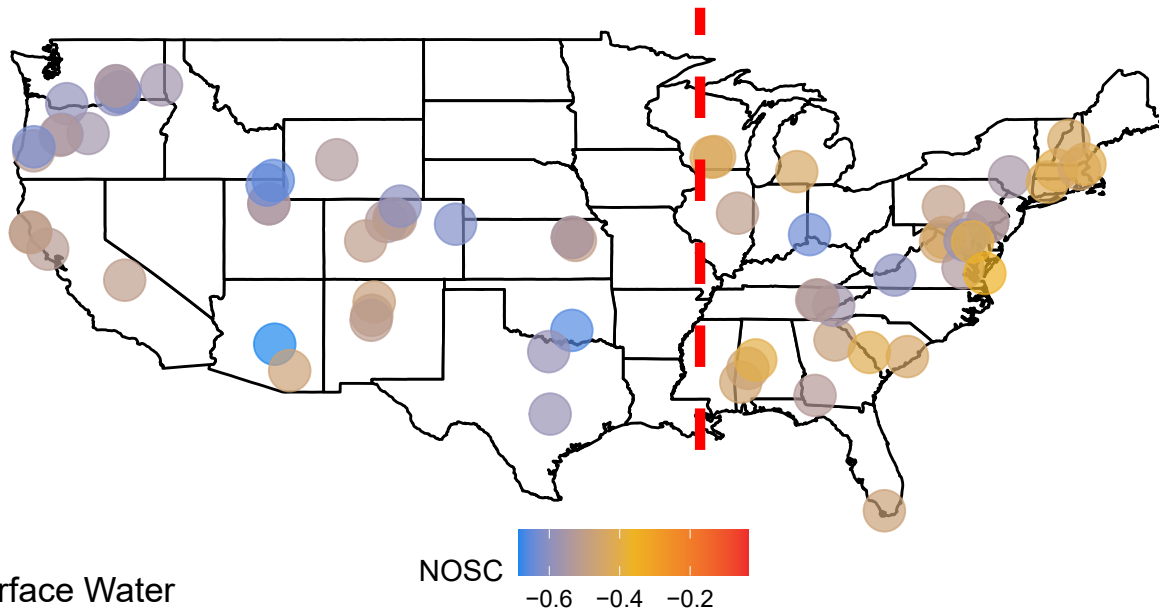

b) Surface Water

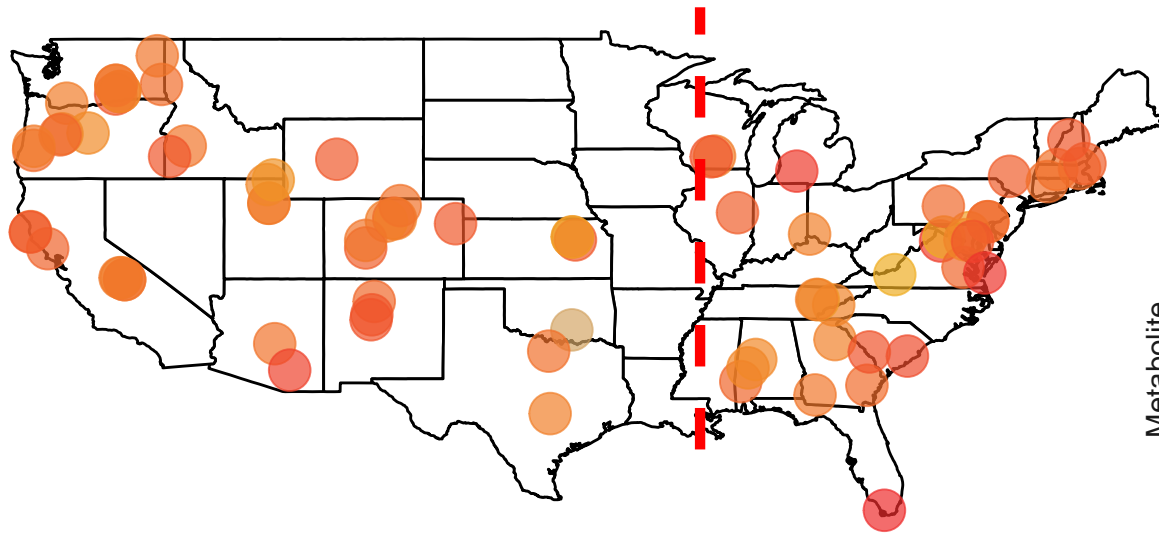

c)

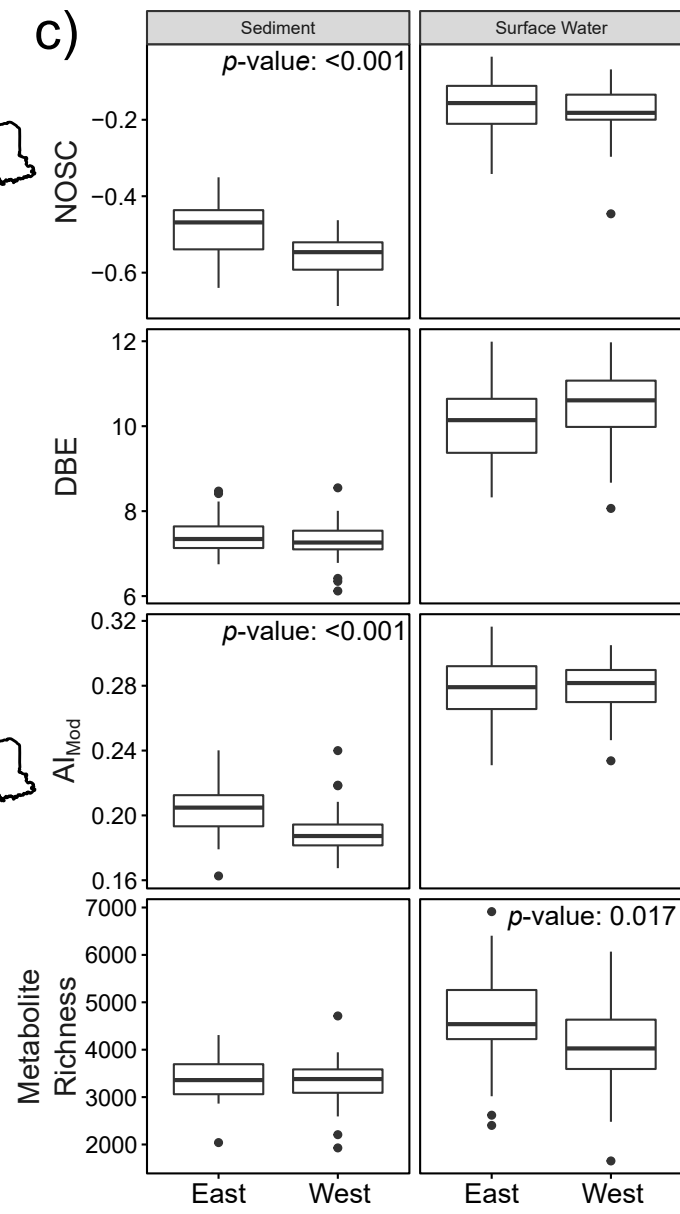



a) Sediment

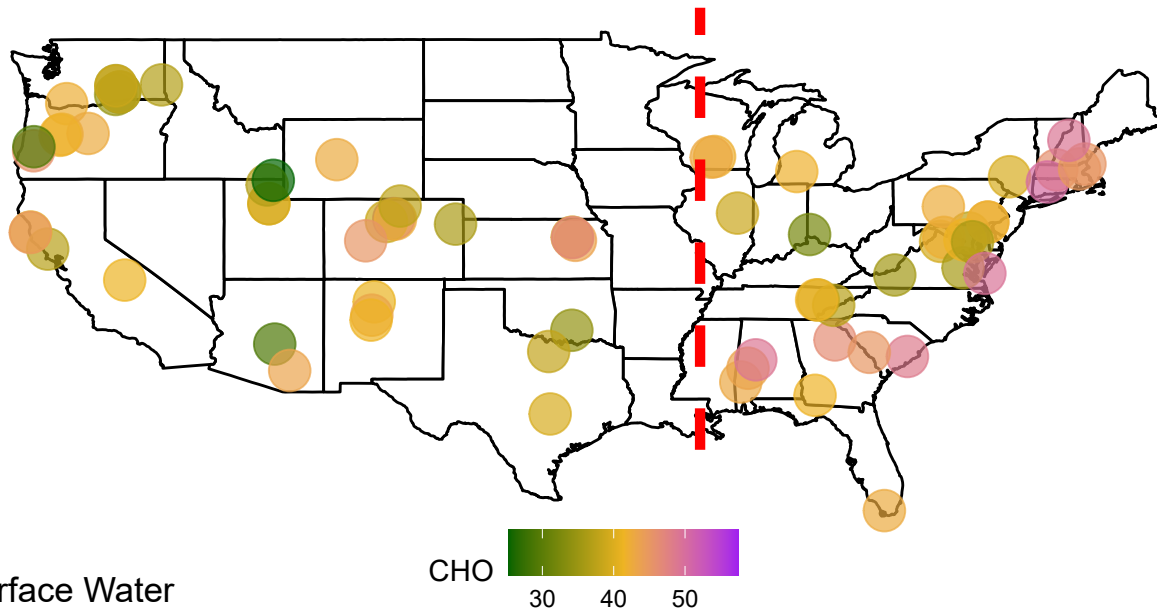

b) Surface Water

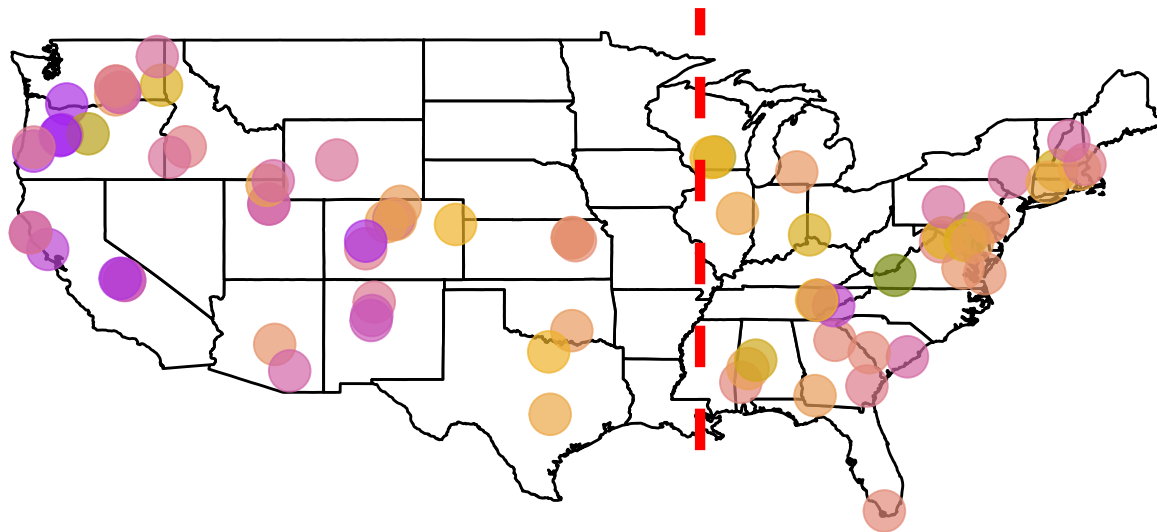

c)

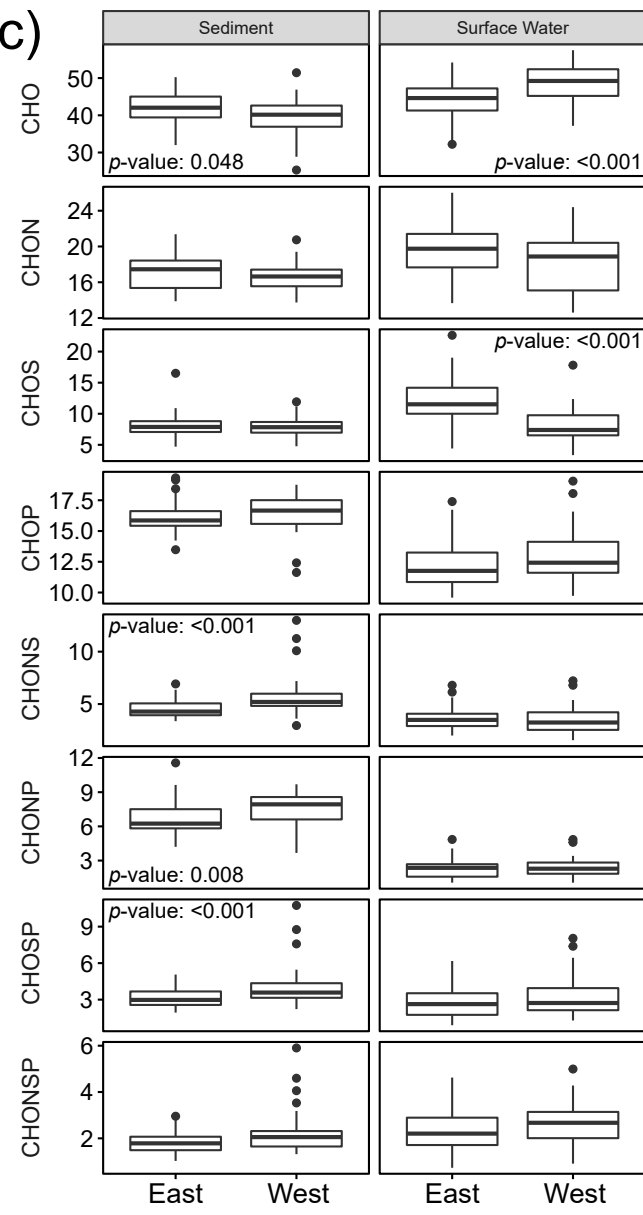

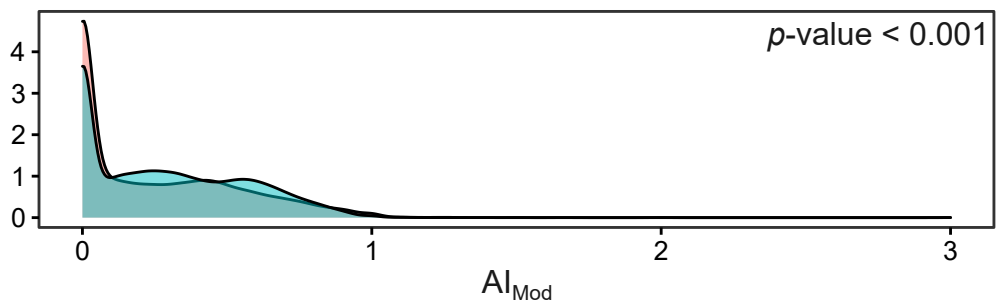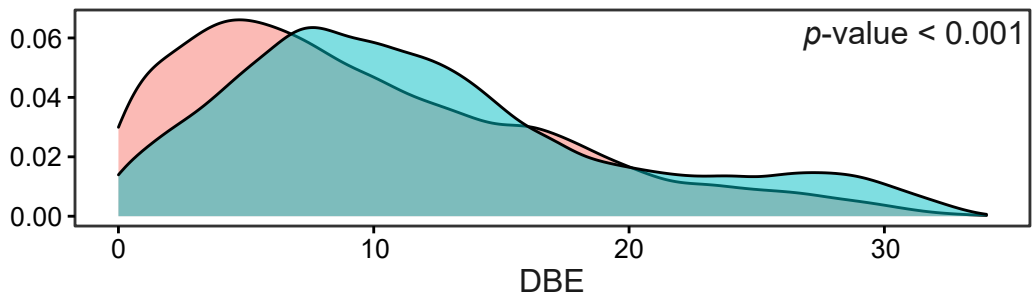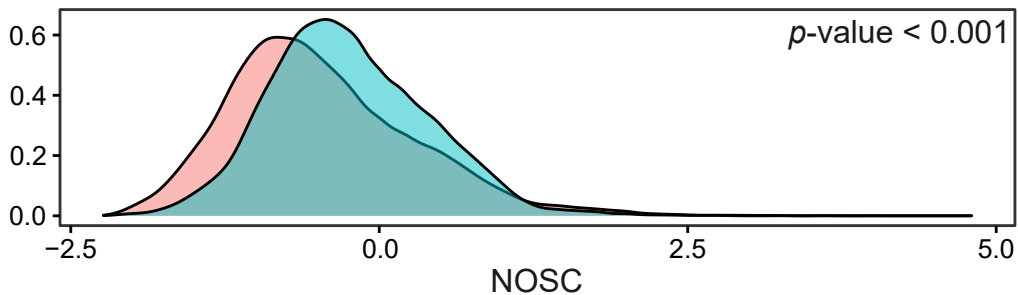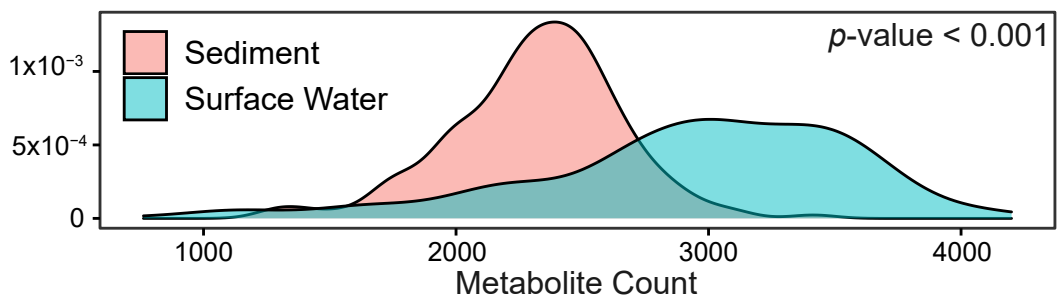

Sample Type: ▭ Sediment ▭ Surface Water

a)

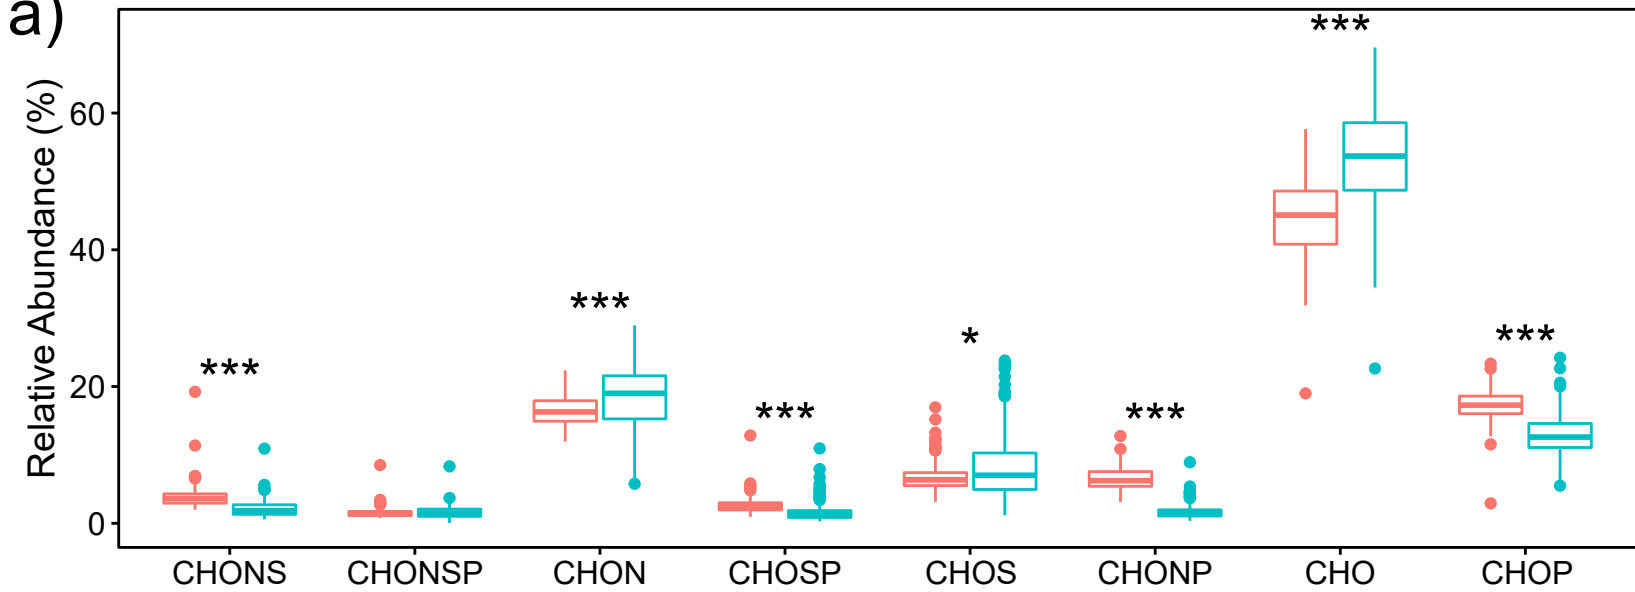

b)

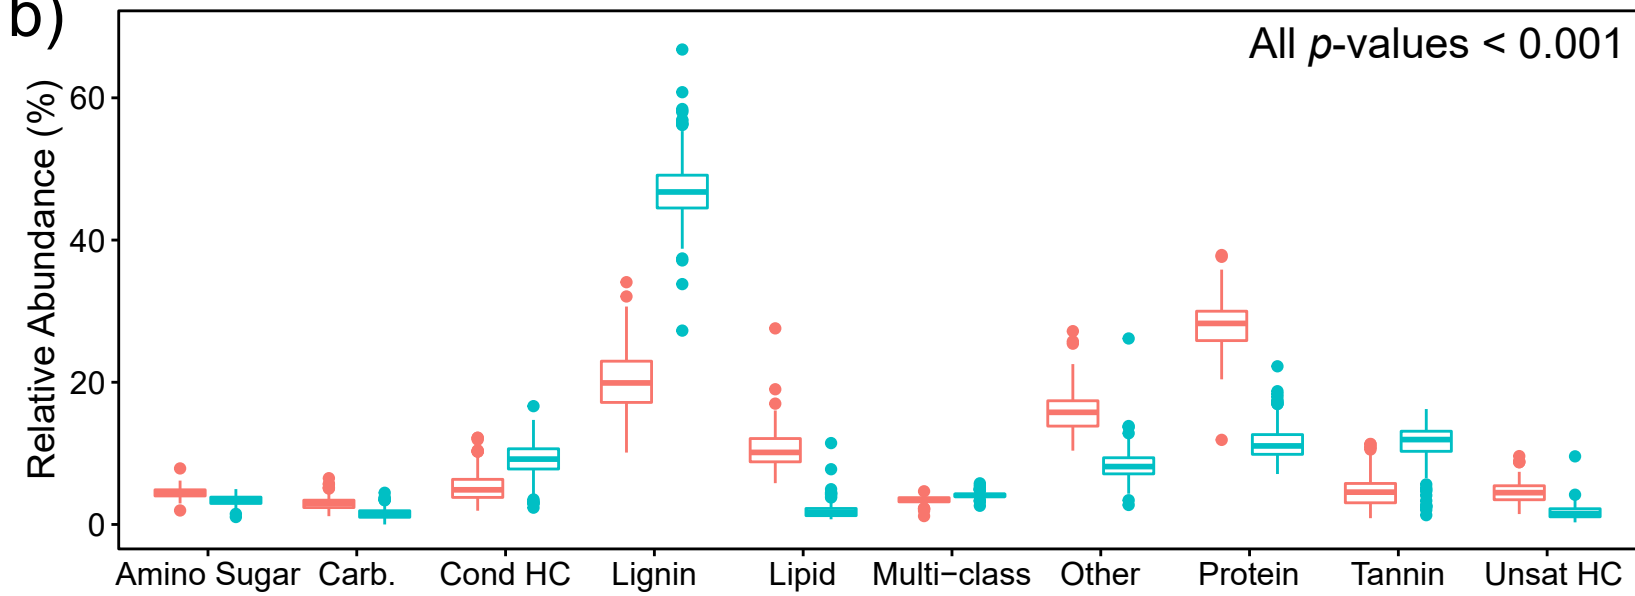

Source: https://www.biorxiv.org/content/biorxiv/early/2020/12/18/2020.11.02.362905.full.pdf
